# 1 Novel combination of CRISPR-based 2 gene drives eliminates resistance 3 and localises spread

4 Nicky R. Faber<sup>1†,2‡\*</sup>, Gus R. McFarlane<sup>1§</sup>, R. Chris Gaynor<sup>1¶</sup>, Ivan Pocrnic<sup>1†</sup>, C. Bruce  
5 A. Whitelaw<sup>1§</sup>, Gregor Gorjanc<sup>1†</sup>

\*For correspondence:

[nfaber@outlook.com](mailto:nfaber@outlook.com) (NRF)

Present address: <sup>†</sup>Highlander Lab,  
Easter Bush Campus, Midlothian,  
EH25 9RG, United Kingdom;

<sup>‡</sup>Laboratory of Genetics,  
Droevendaalsesteeg 4, 6708PB  
Wageningen, The Netherlands;

<sup>§</sup>Whitelaw Lab, Easter Bush  
Campus, Midlothian, EH25 9RG,  
United Kingdom; <sup>¶</sup>Alphagenes  
Group, Easter Bush Campus,  
Midlothian, EH25 9RG, United  
Kingdom

6 <sup>1</sup>The Roslin Institute and Royal (Dick) School of Veterinary Studies, The University of  
7 Edinburgh; <sup>2</sup>Wageningen University & Research

8 **Abstract** Invasive species are among the major driving forces behind biodiversity loss. Gene  
9 drive technology may offer a humane, efficient and cost-effective method of control. For safe and  
10 effective deployment it is vital that a gene drive is both self-limiting and can overcome evolutionary  
11 resistance. We present HD-ClvR, a novel combination of CRISPR-based gene drives that eliminates  
12 resistance and localises spread. As a case study, we model HD-ClvR in the grey squirrel (*Sciurus*  
13 *carolinensis*), which is an invasive pest in the UK and responsible for both biodiversity and economic  
14 losses. HD-ClvR combats resistance allele formation by combining a homing gene drive with a  
15 cleave-and-rescue gene drive. The inclusion of a self-limiting daisyfield gene drive allows for  
16 controllable localisation based on animal supplementation. We use both randomly mating and  
17 spatial models to simulate this strategy. Our findings show that HD-ClvR can effectively control a  
18 targeted grey squirrel population, with little risk to other populations. HD-ClvR offers an efficient,  
19 self-limiting and controllable gene drive for managing invasive pests.  
20

## 21 Introduction

22 CRISPR-based gene drives have the potential to address problems in public health, agriculture and  
23 conservation, including the control of invasive species (*Esvelt et al., 2014*). Invasive species impact  
24 livelihoods, have severe economic consequences, and are among the major driving forces behind  
25 biodiversity loss (*Mooney, 2005; Pejchar and Mooney, 2009; Sala et al., 2000*). Current control  
26 methods such as shooting, trapping, and poisoning are labour-intensive, inhumane, expensive,  
27 and ineffective in dealing with the scope of the problem in most situations (*Luque et al., 2014;*  
28 *Campbell et al., 2015; Gurnell and Pepper, 2016*). Examples of damaging invasive species as a  
29 result of human mediated introduction include rabbits and cane toads in Australia, Asian carp in  
30 the US, and the grey squirrel and American mink in the UK.

31 In this study, we use the grey squirrel (*Sciurus carolinensis*) that is considered invasive in the UK  
32 as a case study for gene drive population control. First introduced in the 19<sup>th</sup> century, the grey  
33 squirrel is now widely distributed across the UK (*Middleton, 1930*). Since their introduction there  
34 has been a major decline in native red squirrels (*Sciurus vulgaris*). Grey squirrels are both larger  
35 and more aggressive than red squirrels and are passive carriers of Squirrelpox virus, which is lethal  
36 to red squirrels (*Tompkins et al., 2002*). Without intervention, red squirrels could be lost from the  
37 UK mainland within the next few decades (*England, 2010*). In addition to their impact on native red  
38 squirrels, grey squirrels also suppress natural forest regeneration through bark stripping of trees  
39 (*Mountford et al., 1999*) and likely have a negative impact on biodiversity of native woodland birds  
40

41 by preying on eggs and chicks (*Hewson and Fuller, 2003*). As an invasive pest they are estimated to  
 42 cost the UK economy more than £14 million per year by debarking trees, gnawing through electricity  
 43 cables and other forms of property damage (*Williams et al., 2010*). A manageable and robust grey  
 44 squirrel control strategy remains to be established (*Gurnell and Pepper, 2016*).

45 CRISPR-based gene drives may offer a humane, efficient, species-specific and cost-effective  
 46 method for controlling invasive species, including grey squirrels in the UK (*Prowse et al., 2017*;  
 47 *McFarlane et al., 2018*); filling a distinct void in the conservation toolbox. Broadly, a gene drive  
 48 skews the inheritance ratio of an allele towards a super-Mendelian rate and therefore drives itself  
 49 to spread quickly through a population (*Burt, 2003*). The CRISPR-Cas system that these gene drives  
 50 are based on comprises two components: a guide RNA (gRNA) and a nonspecific Cas nuclease  
 51 (*Cong et al., 2013*). The gRNA directs the Cas nuclease to a specific sequence in the genome  
 52 where it generates a double stranded break. Several synthetic CRISPR-based gene drives have  
 53 been proposed with three major types aimed at population control: homing, X-shredder and  
 54 cleave-and-rescue (*Figure 1*) (*Champer et al., 2016*). A homing gene drive works through a process  
 55 called 'homing' (*Esvelt et al., 2014*). The system utilises germline-specific expression of CRISPR-Cas  
 56 and subsequent cleavage in the germline, which leads to homology-directed repair (HDR) copying  
 57 the gene drive element onto the homologous chromosome. By locating the homing gene drive  
 58 cassette within the coding sequence of a haplosufficient female fertility gene, thereby disrupting  
 59 the gene's function, female somatic homozygotes will be infertile. As population growth is typically

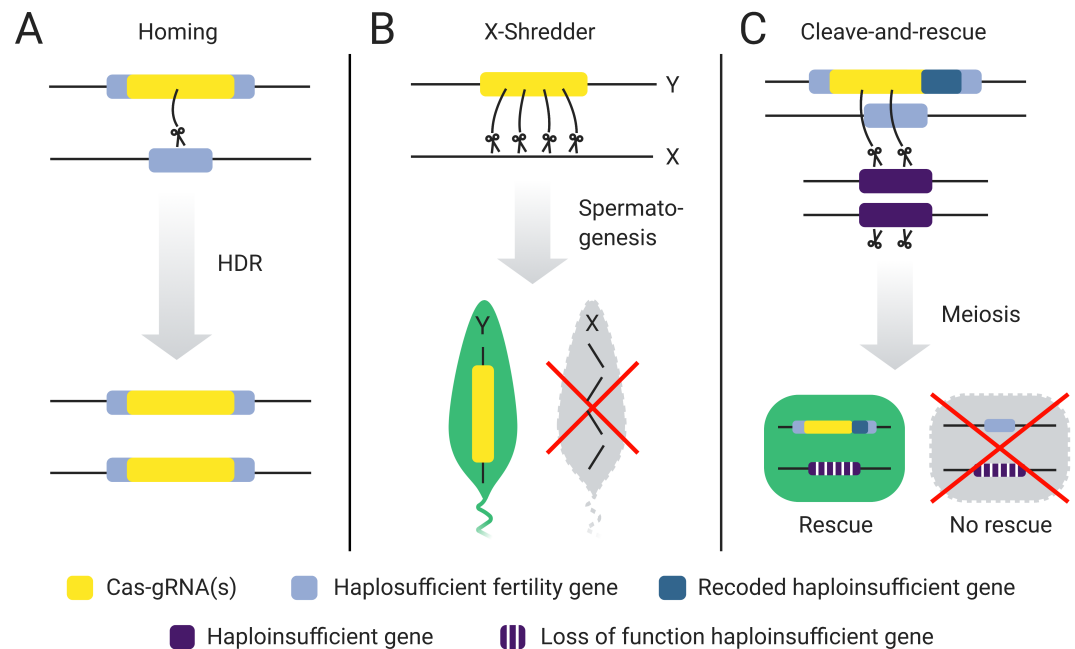

**Figure 1.** Three CRISPR-based gene drives for population suppression. **A)** Homing. A homing gene drive works by copying itself onto the homologous chromosome in the germline by directing Cas-gRNA(s) to cut a target site, which is repaired via homology directed repair (HDR). Therefore, all or most offspring inherit the gene drive. By locating Cas-gRNA(s) in the coding sequence of a haplosufficient female fertility gene, a female is fertile in homozygous state. All females are infertile once the gene drive allele is fixed leading to suppression of the population. **B)** X-shredder. During spermatogenesis, Cas-gRNA(s) are expressed from the Y-chromosome and shred the X-chromosome beyond repair. Therefore, all or most offspring from an X-shredder father will be X-shredder males. Population suppression is achieved by skewing the sex-ratio in favour of males. **C)** Cleave-and-rescue. In the germline, Cas-gRNA(s) breaks an essential haploinsufficient gene whilst also supplying a recoded rescue version of this gene in the gene drive cassette. Therefore, only offspring which inherit the rescue within the gene drive are viable. Like the homing gene drive, the cleave-and-rescue gene drive can be located inside a haplosufficient female fertility gene, thereby making somatic homozygote females infertile and achieving population suppression.

60 controlled by female reproductive performance (*Burt, 2003*), the population will decline in size  
61 due to an increasing number of infertile females within the population. X-shredder gene drive  
62 specifically expresses CRISPR-Cas from the Y-chromosome during spermatogenesis to shred the  
63 X-chromosome at multiple locations beyond repair (*Galizi et al., 2016*). Therefore, only Y-bearing  
64 sperm mature and all or most offspring of an X-shredder father will inherit a gene drive harbouring  
65 Y-chromosome and be male. This eventually leads to a population decline due to the lack of  
66 breeding females. Cleave-and-rescue gene drive uses CRISPR-Cas to cleave an essential gene while  
67 also supplying a recoded, uncleavable 'rescue' copy of this gene within the gene drive cassette  
68 (*Oberhofer et al., 2019*). Therefore, offspring must inherit the gene drive to be viable. This system  
69 can be used to disrupt the function of a female fertility gene.

70 Although all three population suppression gene drives are elegant and promising, they all  
71 face technical challenges. Homing gene drives face two major challenges. First, during *in vivo*  
72 testing, the formation of resistance alleles which block homing have been observed (*Unckless et al.,*  
73 *2017; Champer et al., 2017*). Resistance alleles can form through non-homologous end joining  
74 (NHEJ) instead of the desired homology-directed repair during homing. A potential solution is  
75 gRNA multiplexing (*Prowse et al., 2017*), but this is likely to reduce homing efficiency (*Champer*  
76 *et al., 2018, 2020b*). Second, a homing gene drive that was not hindered by resistant alleles could  
77 theoretically spread indefinitely, thereby compromising global ecosystem safety. To address this  
78 concern, approaches to make gene drives self-limiting have been devised, including versions called  
79 'daisy drives' (*Esvelt and Gemmell, 2017; Noble et al., 2019; Min et al., 2017a,b*). Most daisy drives  
80 are complex and likely difficult to engineer, however, the 'daisyfield' daisy drive is an exception and  
81 provides a straightforward mechanism to limit spread. In a daisyfield gene drive, the gRNAs are  
82 scattered throughout the genome (forming a daisyfield) (*Min et al., 2017b*). These daisy elements  
83 are inherited in a Mendelian fashion, and therefore, offspring inherits half of the daisy elements  
84 from each parent. Thus, the gene drive stops spreading as the daisyfield is diluted through matings  
85 with wildtype individuals. Once all daisy elements have disappeared, all elements of the gene  
86 drive will likely also disappear due to negative selection drift (as homozygotes are infertile). This is  
87 desirable in case gene drive individuals spread to a non-target population. In a population where  
88 further spread is required, gene drive individuals with a complete daisyfield can be supplemented  
89 to keep the gene drive spreading. The rate and extent of suppression can be controlled by the  
90 number of gene drive animals supplemented and how many daisy elements the introduced animals  
91 carry. In contrast to homing gene drive, X-shredder gene drives face problems with the formation of  
92 a population equilibrium, depending on shredding efficiency (*Beaghton et al., 2017; Champer et al.,*  
93 *2019*). Furthermore, a major challenge in developing X-shredder in mammals is the identification  
94 of a highly-specific spermatogenesis promoter to drive Cas-gRNA expression (*McFarlane et al.,*  
95 *2018*). Cleave-and-rescue gene drives have the advantage that multiplexing does not reduce  
96 efficiency as there is no homing involved, and therefore, the formation of resistance alleles is  
97 limited. Furthermore, cleave-and-rescue gene drives also show density-dependent dynamics, which  
98 can be exploited to keep the gene drive contained (*Champer et al., 2020a*). This poses practical  
99 challenges as it requires an accurate estimate of population size and the release of a large number  
100 of animals simultaneously.

101 A population control gene drive system that is effective, self-limiting, and controllable has yet to  
102 be designed. In this study, we present HD-CIvR, a novel combination of gene drives that eliminates  
103 resistance, is self-limiting, and can be controlled in a reliable manner. HD-CIvR is composed of  
104 homing (H), daisyfield (D), and cleave-and-rescue (CIvR) gene drives. Our modelling in grey squirrel  
105 demonstrates the strategy is highly efficient and overcomes the ongoing issue of resistance allele  
106 formation of homing gene drives. The daisyfield gene drive ensures self-limitation and allows for  
107 controlled, localised spread. Therefore, HD-CIvR could effectively control a targeted grey squirrel  
108 population, with little risk to other populations. Our analysis includes a randomly mating population  
109 and a spatially distributed population, which mimics the UK grey squirrel, though it can be adapted  
110 to other species. This study provides the first promising steps towards the development and testing

111 of HD-CivR.

## 112 Results

113 HD-CivR is a combination of three gene drives: homing, daisyfield, and cleave-and-rescue. Our  
114 randomly mating and spatial modelling of this strategy in grey squirrel illustrates that HD-CivR can  
115 effectively eliminate resistance allele formation, allows for optimised gRNA multiplexing, improves  
116 efficiency over standard cleave-and-rescue drives, and is both self-limiting and controllable. We find  
117 that the placement of supplemented animals significantly impacts the effectiveness of HD-CivR, but  
118 that this is not prohibitive to the spread of the gene drive and that an effective placement strategy  
119 can achieve a rate of gene drive spread close to a randomly mating population.

### 120 Eliminating resistance alleles

121 By combining a homing gene drive with a cleave-and-rescue gene drive, HD-CivR eliminates resis-  
122 tance alleles which occasionally form during gene drive homing (*Figure 2A*). This works as follows:  
123 as germline homing occurs, both copies of a haploinsufficient essential gene are cleaved, and  
124 their function is destroyed through erroneous NHEJ-based repair. However, the homing construct  
125 contains a recoded, uncleavable copy of this haploinsufficient gene as a 'rescue'. For offspring to  
126 be viable, they must inherit the gene drive with the rescue to have sufficient expression of the  
127 haploinsufficient gene. Offspring that inherit a resistance allele instead of the gene drive will not  
128 develop as they lack the rescue gene to compensate for their broken copy of the haploinsufficient  
129 gene. This mechanism prevents the spread of resistance alleles.

130 HD-CivR also allows for independent optimising of gRNA multiplexing for both homing efficiency  
131 and resistant allele elimination. Multiplexing gRNAs can overcome resistance allele formation,  
132 allowing homing to take place even if some resistant gRNA sites are present. With a standard  
133 homing gene drive, the optimal number of gRNAs is a trade-off between homing efficiency and  
134 overcoming resistance allele formation. Two gRNAs has been proposed as optimal for homing, with  
135 efficiency decreasing when more than two gRNAs are used (*Champer et al., 2020b*). However, to  
136 also limit the formation of resistance alleles, the optimal number in the trade-off lies between 4  
137 and 8 (*Champer et al., 2020b*). In contrast, with HD-CivR it is possible to select the optimal number  
138 of gRNAs for homing, while multiplexing several gRNAs within the cleave-and-rescue to reduce the  
139 probability of resistance allele formation to effectively zero. Current data suggests four gRNAs is  
140 sufficient to prevent resistant allele formation (*Champer et al., 2020b*).

141 In grey squirrel, we have selected two genes through literature mining which are suitable for  
142 HD-CivR: Progesterone Receptor (PGR) as a haploinsufficient female fertility gene and Delta-Like  
143 Canonical Notch Ligand 4 (DLL4) as a haploinsufficient essential gene. Both of these genes are  
144 conserved across many taxa and could also be used for other invasive species (*Huerta-Cepas et al.,*  
145 *2019*). *Figure 2B* shows a candidate HD-CivR construct design for grey squirrel control, using 1 gRNA  
146 for homing and 4 gRNAs for cleave-and-rescue.

147 To demonstrate that combining a homing and cleave-and-rescue gene drive can eliminate the  
148 formation of resistance alleles, we model a standard homing gene drive, a standard cleave-and-  
149 rescue gene drive, and a homing-cleave-and-rescue gene drive in a randomly mating population  
150 of grey squirrels over different rates of NHEJ ( $P_n$ , *Figure 3*). Like (*Prowse et al., 2017*), we model  
151 no fitness cost to heterozygote gene drive animals. Our model uses either 1 or 4 gRNAs to show  
152 multiplexing reduces resistance allele formation. For the standard cleave-and-rescue gene drive,  
153 we modelled the release of 1000 gene drive squirrels instead of 100 gene drive squirrels, as this  
154 form of drive is only effective at a large introduction frequency. A standard homing gene drive was  
155 effective at low rates of NHEJ ( $P_n$  and 0.1) when multiplexing 4 gRNAs but is inhibited by resistant  
156 alleles when only 1 gRNA is used at the same rates of NHEJ. However, at a higher rate of NHEJ  
157 ( $P_n = 0.5$ ), squirrels with resistant alleles rescue the population from standard homing gene drive  
158 suppression despite multiplexing 4 gRNAs. In contrast, with a homing-cleave-and-rescue gene drive,  
159 resistant alleles are eliminated, and the squirrel population is completely suppressed across all

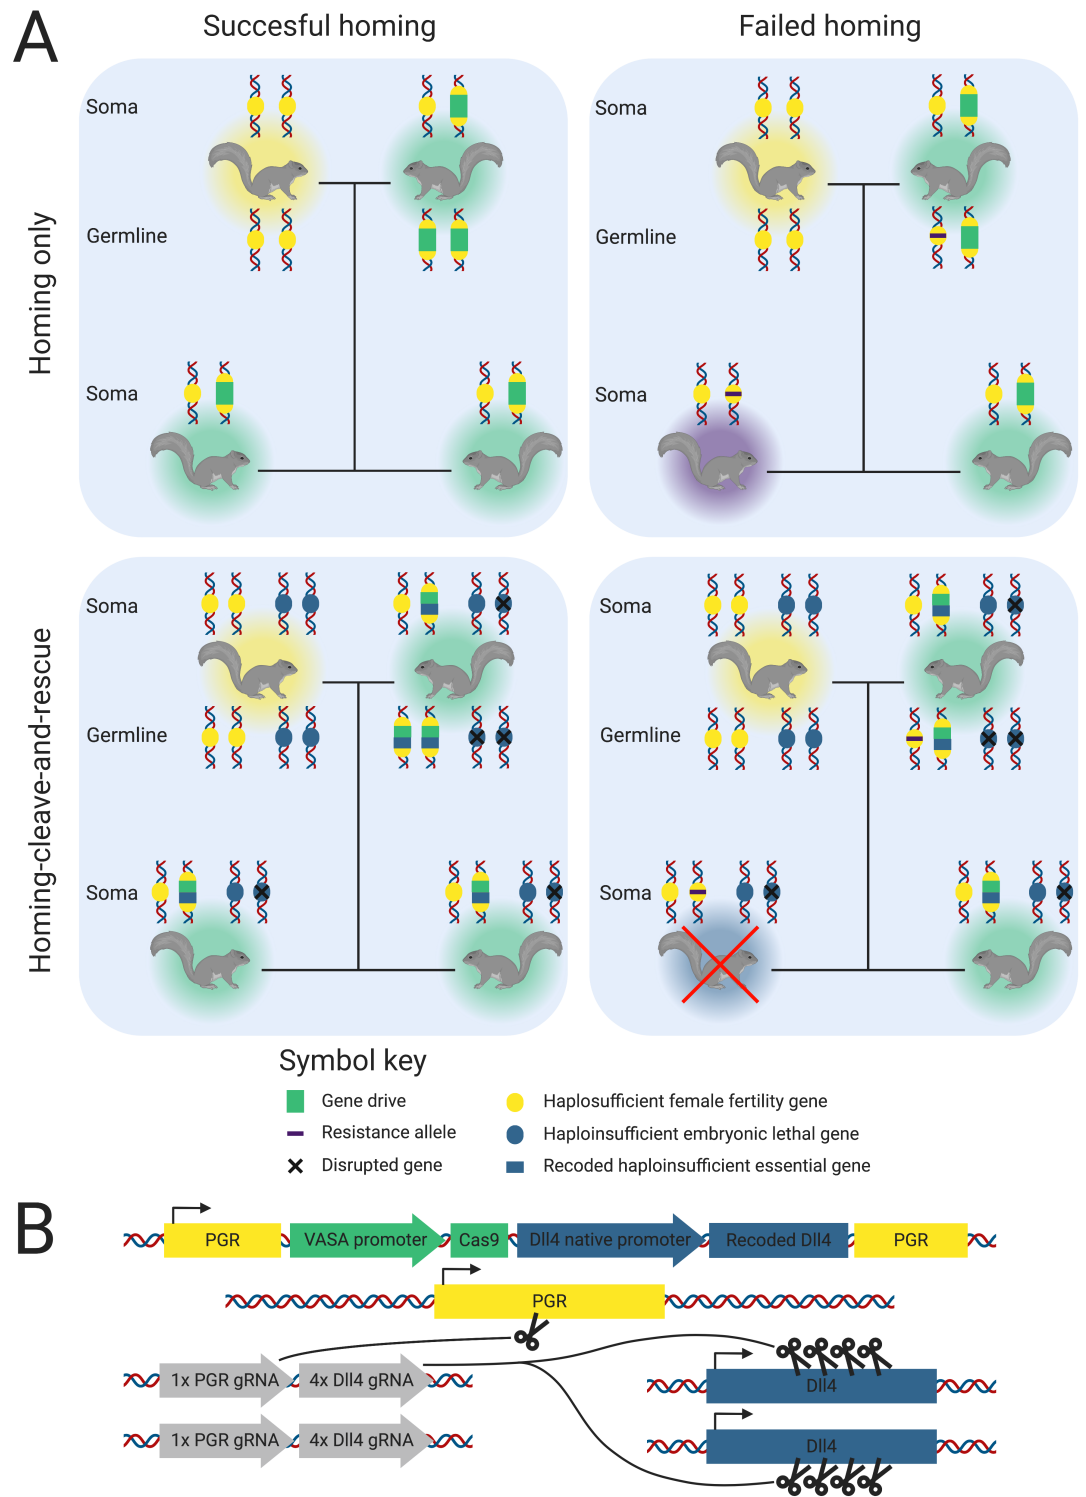

**Figure 2. A)** A comparison of the inheritance scenarios of a homing-only gene drive (top row) and a homing-cleave-and-rescue gene drive (bottom row). The two panels in the left column show inheritance when homing is successful, and the two panels on the right show inheritance when homing fails. Each panel shows two parent squirrels and two offspring, each with the loci relevant for the gene drive. A legend for the gene drive components is provided. Squirrels colour coded halos represent their genotype: yellow = wildtype, turquoise = gene drive, purple = resistant, and blue = non-viable. **B)** A potential HD-CivR construct for grey squirrel. Colour coding is consistent with **A** and additionally, gRNAs are shown in grey. The gRNAs shown in this figure constitute one daisy element, multiple of these would constitute a daisyfield.

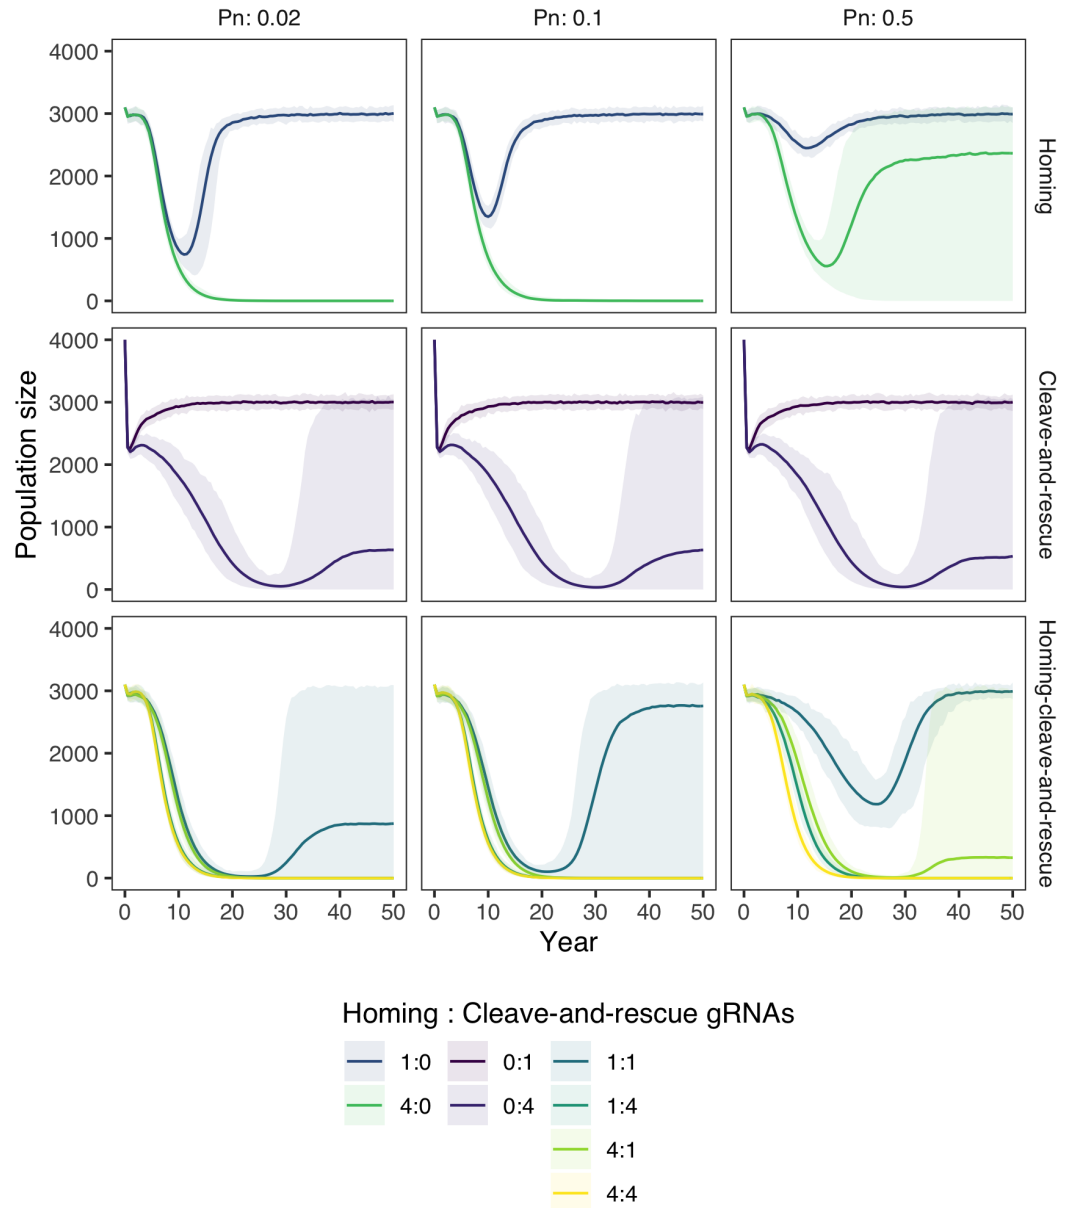

**Figure 3.** Population size over time after the introduction of gene drive squirrels with either a standard homing, a standard cleave-and-rescue, or a homing-cleave-and-rescue gene drive to a population with carrying capacity 3,000. All simulations are based on a single release of 100 squirrels is done, other than the standard cleave-and-rescue gene drive, which requires a release of 1000 squirrels. Lines represent the average population size over 100 model replications, while opaque ribbons represent the 95% quantiles. The model was run with 3 different rates of NHEJ repair during homing ( $P_n$ ) and with different numbers of gRNAs for the homing and the cleave-and-rescue components of the gene drive.

**Figure 3-Figure supplement 1.** The same as *Figure 3*, but run in a big population with a carrying capacity of 30,000. Introduction numbers were kept at 100, but for the standard cleave-and-rescue gene drives, an introduction frequency of 10,000 was used because of its density dependent mechanics.

**Figure 3-Figure supplement 2.** An exploration of which type of gene is best targetted by the cleave-and-rescue part of the homing-cleave-and-rescue gene drive: both-sex infertility or developmental non-viability, and overexpression biologically tolerable or not. Parameters are kept the same as in *Figure 3*, except that we used 1 gRNA for the homing part of the gene drive, and either 1, 2 or 4 gRNAs for the cleave-and-rescue part.

160 rates of NHEJ when 4 gRNAs are used in the cleave-and-rescue component of the drive. When we  
161 compare the three gene drive types in a large population of carrying capacity 30,000 instead of  
162 3,000, we see the same dynamics (*Figure 3–Figure Supplement 1*).

163 Although we model the homing gene drive component of HD-CivR targeting a haplosufficient  
164 female fertility gene in this study, HD-CivR is adaptable and could target any desirable gene to  
165 generate a loss of function mutation through insertion disruption or propagate a genetic cargo of  
166 interest. The cleave-and-rescue component of the HD-CivR targets a haploinsufficient developmen-  
167 tal gene in this study but this could also be adjusted to a haploinsufficient both-sex infertility  
168 gene. Our results suggest it is marginally more efficient to target an embryonic lethal gene (*Figure 3–*  
169 *Figure Supplement 2*), as this prevents infertile resistant individuals from competing with gene drive  
170 individuals for resources. From an ethical standpoint the reduction in efficiency when targeting  
171 a both-sex fertility gene, instead of an embryonic lethal gene, may be justified by the improved  
172 societal and political acceptance for a strategy that evades killing and suppresses through infertility.  
173 Additionally, we tested if overexpression of the cleave-and-rescue target gene should be biologically  
174 tolerable (*Figure 3–Figure Supplement 2*). We conclude that when multiplexing sufficiently for the  
175 cleave-and-rescue part of the gene drive, there is no difference. As can be seen from the dynamics  
176 when multiplexing less or not at all, allowing overexpression makes the gene drive initially faster to  
177 spread, but also allows resistance alleles to persist in the population.

### 178 **Self-limitation and control**

179 A key benefit of HD-CivR is that by including a daisyfield gene drive, it is self-limiting and can  
180 be controlled based on the number of supplemented gene drive animals and number of daisy  
181 elements each supplemented animal harbours (*Figure 4*). Unlike a standard homing gene drive,  
182 HD-CivR can control the rate and extent of population suppression and, if required, suppression  
183 could be stopped by terminating further animal supplementation. Additionally, HD-CivR does not  
184 require the large initial releases of standard cleave-and-rescue animals, which places pressure on  
185 the local ecosystem.

186 Using our randomly mating model, we show in *Figure 4* that by including a daisyfield system in a  
187 homing-cleave-and-rescue drive to form HD-CivR, we can efficiently suppress a targeted population,  
188 while limiting risk to other populations, especially if those are bigger than the target population  
189 (*Figure 4–Figure Supplement 1*). We modelled HD-CivR with different daisyfield sizes in a population  
190 of 3,000 grey squirrel over different rates of annual supplementation following an initial release  
191 of 100 HD-CivR squirrels. The model shows that once the HD-CivR runs out of daisy elements the  
192 population recovers. Therefore, HD-CivR poses less risk to non-target populations than a standard  
193 homing gene drive. With 1% annual supplementation of HD-CivR squirrels, the population size is  
194 reduced and maintained at an equilibrium, and with 10% annual supplementation the targeted  
195 population of grey squirrel is removed for all daisyfield sizes. In *Figure 4–Figure Supplement 2*, we  
196 show that it is possible to suppress a population without an accurate estimation of population  
197 size, which will be hard to obtain for most wild populations. To find the optimal combination of  
198 supplementation rate and daisyfield size, we ran a range of these two parameters and found that  
199 5% supplementation would be sufficient to suppress a population, even with a small daisyfield  
200 (*Figure 4–Figure Supplement 3*).

### 201 **Spatial dynamics and supplementation of HD-CivR**

202 To understand the spatial dynamics of homing-cleave-and-rescue drives, initially excluding daisyfield,  
203 we modelled this approach in a simple spatial model. Modelling a single release of 100 homing-  
204 cleave-and-rescue gene drive squirrels in populations of 3,000 and 30,000 squirrels, the model  
205 demonstrated that the spatial life history of grey squirrel allows for the spread of the gene drive  
206 (*Figure 5*). We also show that the removal of the target squirrel population is more delayed in the  
207 spatial model than in the randomly mating population model. This difference is approximately five  
208 years in a small population, and is increased to approximately 15 to 20 years in a big population. To

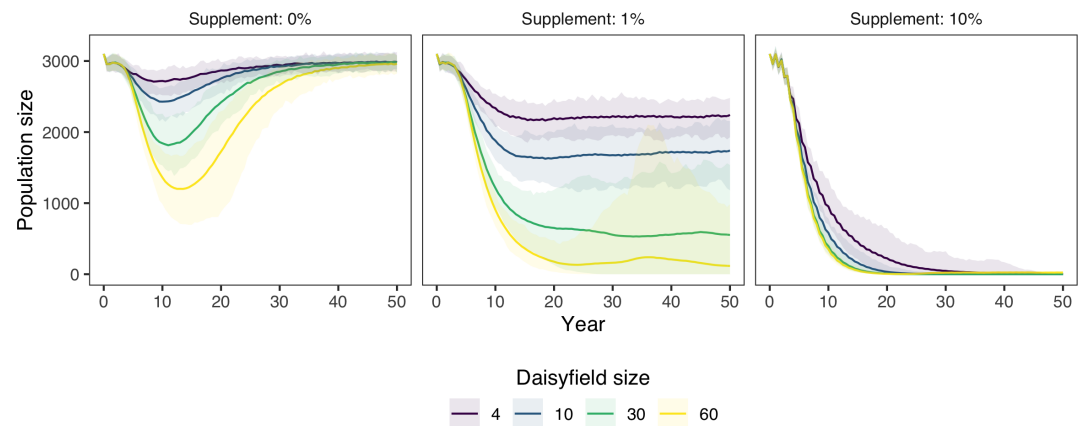

**Figure 4.** Population size over time after the introduction of 100 squirrels with a HD-CIvR gene drive to a population of carrying capacity 3,000. Lines represent the average population size over 100 model replications, while opaque ribbons represent the 95% quantiles. The model was run with an NHEJ rate ( $P_n$ ) of 0.02, 1 homing gRNA, and 4 cleave-and-rescue gRNAs. Gene drive squirrel supplementation was done yearly, the amount being a percentage (0, 1, or 10%) of the total population size at that moment.

**Figure 4-Figure supplement 1.** The same as **Figure 4**, but run in a big population with a carrying capacity of 30,000.

**Figure 4-Figure supplement 2.** The same as **Figure 4**, but instead of an accurate estimate of the population size for supplementation, a certain level of error is introduced. The error is defined as a normal distribution with the true population size as mean and a certain percentage of the true population size as standard deviation.

**Figure 4-Figure supplement 3.** The same as **Figure 4**, but ran with a range of supplementation amounts and daisyfield sizes. Suppression rate is defined as the proportion of populations (out of the 100 repetitions of the model) that were completely suppressed after 50 years.

209 test the sensitivity of our model to two crucial parameters, mating range and migration range, we  
210 performed a sensitivity analysis and conclude that the model is sensitive to a decreased mating  
211 range, but not to a decreased migration range (**Figure 5-Figure Supplement 1**).

212 Using our spatial model, we then explored how the placement of supplemented HD-CIvR  
213 animals could impact population suppression. We show the impact of different supplementation  
214 placement schemes by modelling five strategies: mean of population location, mode of population  
215 location, randomly, randomly in 10 groups, and in a moving front (**Figure 6A**). The moving front  
216 was implemented such that we start at the bottom and move upwards in ten steps, thereafter,  
217 supplementing at the topmost location. As can be seen in **Figure 6B**, different placement schemes  
218 significantly affect the efficiency of the strategy. Placement at the mean population location was  
219 least effective and placement of squirrels randomly in 10 groups was most effective. **Figure 6C**  
220 shows three moments which represent key spatial dynamics of each placement scheme. For  
221 animations of the spatial dynamics over the whole timeline, see the animated GIFs (**Figure 6-**  
222 **video 1**).

## 223 Discussion

224 This research presents HD-CIvR, which is a combination of three gene drives: homing, cleave-and-  
225 rescue and daisyfield. Our modelling indicates that HD-CIvR overcomes an important trade-off in  
226 current homing gene drive designs: the trade-off between resistance allele formation and gene drive  
227 efficiency. This strategy benefits from the efficiency of a homing gene drive and the evolutionary  
228 stability of cleave-and-rescue gene drive. Due to the inclusion of a daisyfield system, HD-CIvR is  
229 self-limiting and can be controlled by supplementation of gene drive animals.



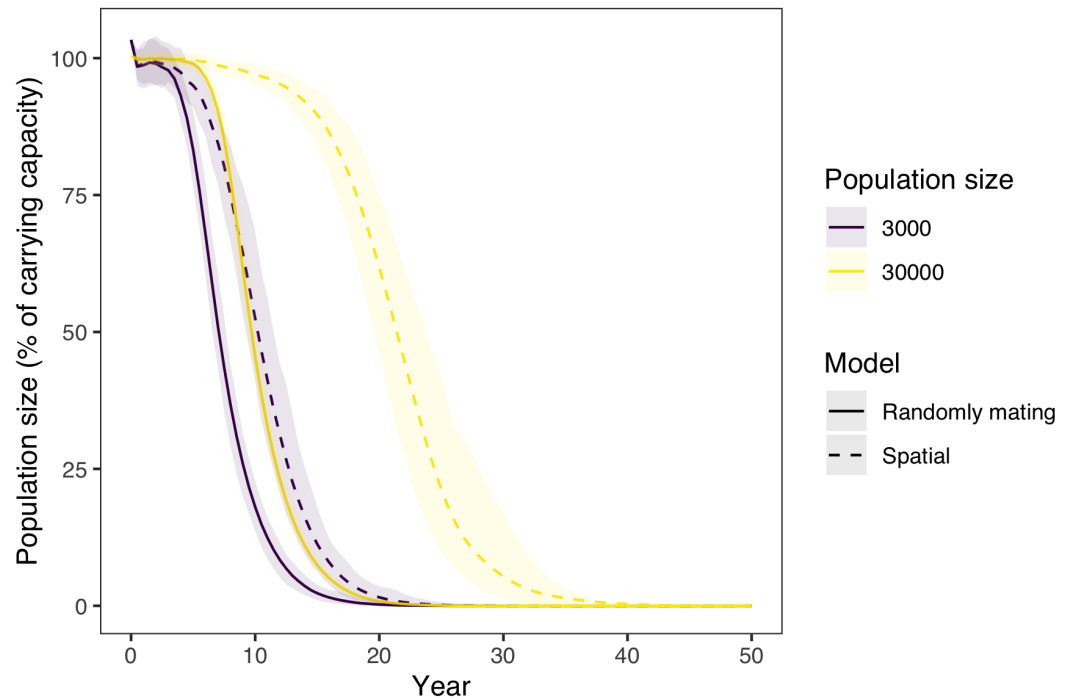

**Figure 5.** Population size over time after the introduction of 100 squirrels with a homing-cleave-and-rescue gene drive with 1 homing gRNA and 4 cleave-and-rescue gRNAs. The model was run for a randomly mating and a spatial model, and also for a small (carrying capacity 3,000) and large population (carrying capacity 30,000). In the spatial model, gene drive squirrels were placed in the middle of the area. An NHEJ rate ( $P_H$ ) of 0.02 was used. Lines represent the average population size over 100 model replications, while opaque ribbons represent the 95% quantiles.

**Figure 5-Figure supplement 1.** The same as the small population with a carrying capacity of 3,000 in a spatial model in **Figure 5**, but a sensitivity analysis of two crucial parameters: mating range and migration range.

### 230 HD-CIvR compared to other gene drives

231 Over recent years, many different gene drives have been published and developments have  
232 been geared towards both efficiency and safety (*Champer et al., 2016*). An ongoing issue has  
233 been the development of resistance alleles. For CRISPR-based homing gene drive there are two  
234 fundamental approaches to combat resistance allele formation: careful gRNA targeting and gRNA  
235 multiplexing. When a gRNA targets a conserved sequence in a gene, resistance alleles are likely  
236 to disrupt gene function through NHEJ repair and will therefore reduce fitness (*Kyrou et al., 2018*).  
237 Recently, population suppression was already shown to work with a carefully targeted homing gene  
238 drive in contained mosquito populations (*Kyrou et al., 2018*), however, current data suggests that  
239 homing might be less efficient in mammals than in insects (*Grunwald et al., 2019*). Very recently, a  
240 new preprint has proposed a gene drive very similar to HD-CIvR, which combines a homing and  
241 cleave-and-rescue gene drive to combat resistance alleles (*Kandul et al., 2020*).

242 In addition to targeting conserved sequences, when gRNA multiplexing, resistant allele  
243 formation is reduced because multiple sites are targeted simultaneously. For homing gene drives,  
244 multiplexing has been shown to reduce homing efficiency when more than two gRNAs are used  
245 (*Champer et al., 2020b*). In contrast, cleave-and-rescue gene drives do not have this problem, as  
246 they do not use homing and can therefore multiplex gRNAs without any efficiency costs. HD-CIvR  
247 separates the elimination of resistance alleles and homing efficiency, and therefore gRNAs can be  
248 optimised for both goals separately.

249 To date, most gene drive research has focused on improving the efficiency, however, equally  
250 important is the development of strategies that allow for containment, or even reversibility, of

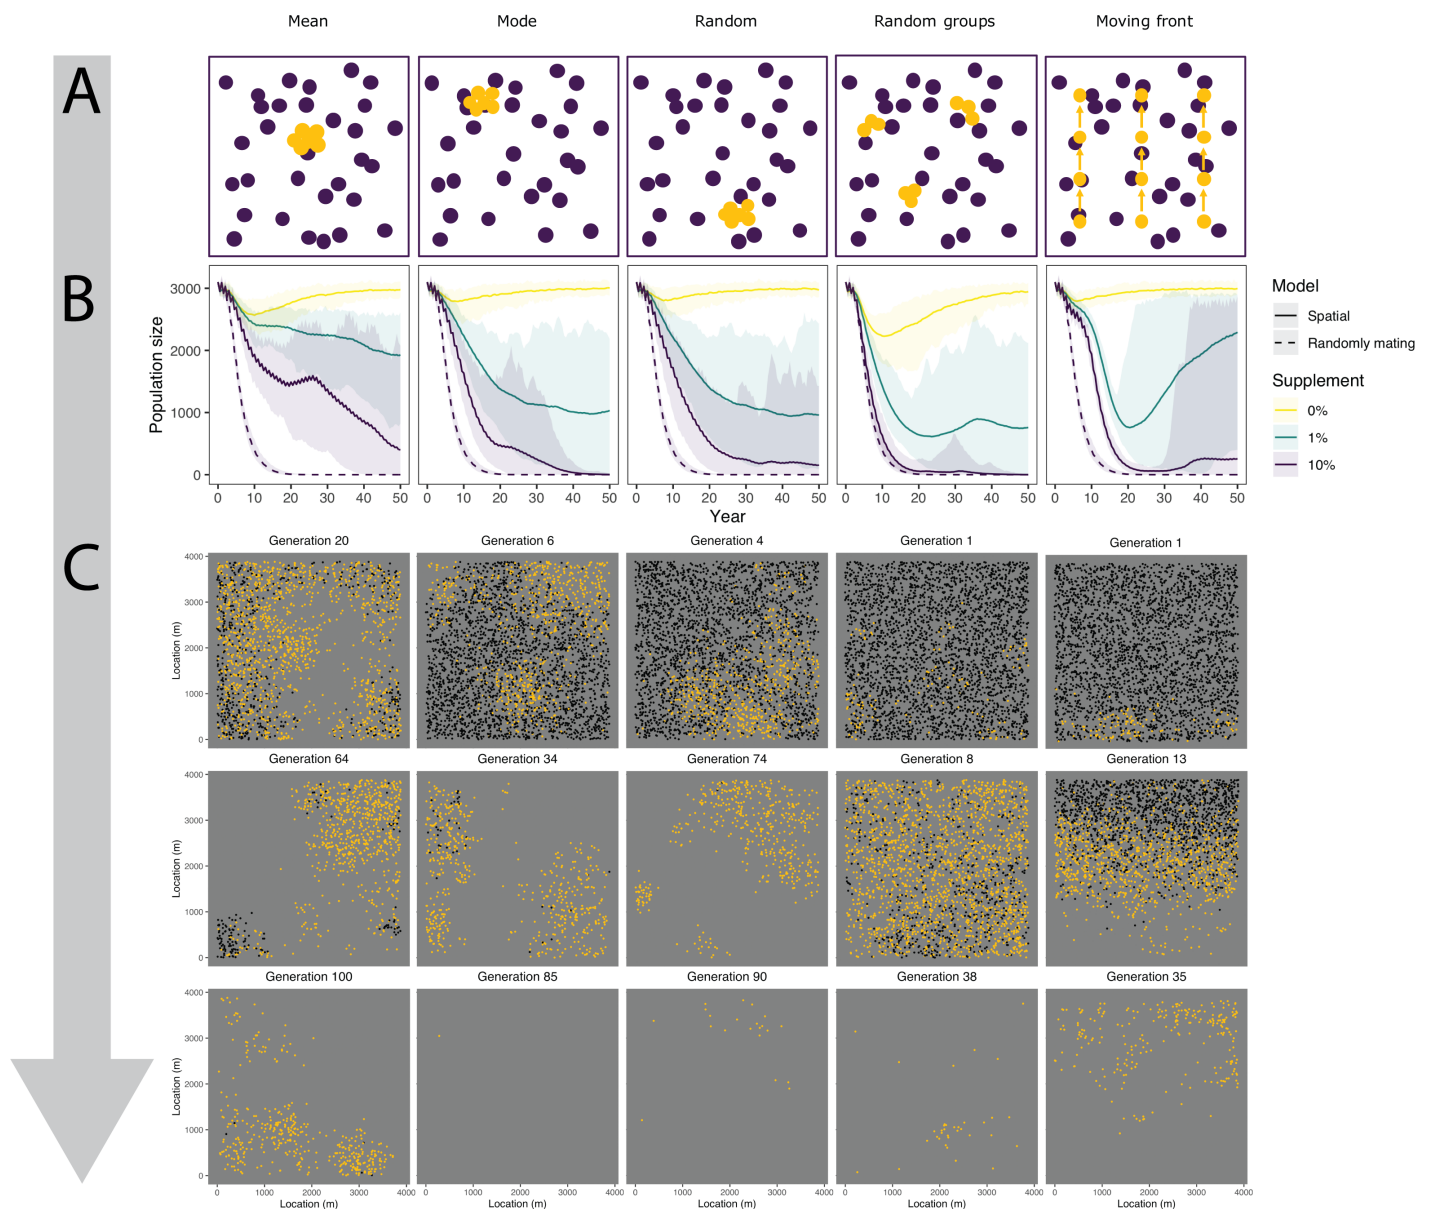

**Figure 6.** Spatial dynamics of HD-CivR using different placement schemes. **A)** A schematic overview of the placement schemes. **B)** Population size as a function of the placement schemes and amounts of supplementation. We modelled population size over time after the introduction of 100 squirrels with a HD-CivR gene drive with 1 homing gRNA and 4 cleave-and-rescue gRNAs to a population of carrying capacity 3,000. We modelled an NHEJ rate ( $P_n$ ) of 0.02 and a daisyfield of size 30. **C)** Three snapshots of moments representing key spatial dynamics at 10% supplementation. See the full animations in [video 1](#).

**Figure 6-video 1.** Full animations of the spatial dynamics of HD-CivR using the five placement schemes (see [https://git.ecdf.ed.ac.uk/HighlanderLab\\_public/nfaber\\_squirrel\\_gd/tree/master/Fig6\\_GIFs](https://git.ecdf.ed.ac.uk/HighlanderLab_public/nfaber_squirrel_gd/tree/master/Fig6_GIFs)). We model the spatial dynamics of a population over time after the introduction of 100 squirrels with a HD-CivR gene drive with 1 homing gRNA and 4 cleave-and-rescue gRNAs to a population of carrying capacity 3,000. We modelled an NHEJ rate ( $P_n$ ) of 0.02, a daisyfield of size 30 and a supplementation amount of 10%.

251 the gene drives (*Esvelt and Gemmell, 2017; Marshall and Hay, 2012*). For contained gene drives,  
 252 density dependence is often used, which requires large numbers of gene drive individuals to be  
 253 released into a target population to spread (*Edgington and Alphey, 2017*). Therefore, non-target  
 254 populations are unlikely to be affected by this type of gene drive. However, a large single release  
 255 of gene drive individuals can put significant pressure on the local ecosystem, and if a population  
 256 is already at carrying capacity, it may lead to starvation or mass migration of the population. In

257 contrast, HD-CivR uses ongoing input in the form gene drive animals to control the extent of  
258 population suppression and contain spread. Although this comes with increased cost and labour,  
259 we believe this is justified by the improved control and safety HD-CivR could offer over current gene  
260 drives.

261 As stated above, the initial introduction frequency for a standard cleave-and-rescue gene drive  
262 in our randomly mating model was increased 10-fold over the other homing-based strategies. This  
263 increase is necessary due to the significant cost to the reproduction rate that is incurred when  
264 using a standard cleave-and-rescue gene drive. On average, cleave-and-rescue animals will produce  
265 50% less offspring than wild-type animals (*Oberhofer et al., 2019; Champer et al., 2020a*). This  
266 significantly slows the spread of the gene drive and due to density dependent dynamics, requires  
267 large initial releases of cleave-and-rescue animals for population suppression. With a homing-  
268 cleave-and-rescue drive, more offspring inherit the drive and there is less cost to the reproduction  
269 rate. Effectively, for homing-cleave-and-rescue, the reproduction rate of gene drive individuals is  
270 equal to the homing efficiency (plus half of the homing failure rate, where the gene drive is inherited  
271 by chance), which so far has been shown to range from 0.7 to 1 in different organisms (*Kyrou et al.,*  
272 *2018; Gantz et al., 2015; Grunwald et al., 2019*).

### 273 **Supplementation**

274 As animal supplementation is a critical component of HD-CivR, our modelling investigated how  
275 daisyfield size and the level and placement of supplemented HD-CivR animals effects efficiency  
276 and safety of population suppression. Optimisation of these parameters can significantly reduce  
277 cost and labour, as well as reduce the risk of unwanted impacts on non-target populations. We  
278 modelled our supplementation as a percentage of the total population size, therefore the number  
279 of individuals needed for supplementation increases linearly with population size. We also want to  
280 minimise the risk of non-target populations being impacted by the gene drive, and therefore, there  
281 is a trade-off between safety (size of the daisyfield) and cost and labour (level of supplementation  
282 required).

283 The least number of daisy elements that can suppress the population with a realistic level  
284 of supplementation, but does not cause any serious issues in non-target populations, should be  
285 objectively established through an in-depth risk assessment process. In a larger population however,  
286 the spread is slower than in a small one. Therefore, for improved safety and efficiency, gene drives  
287 are best applied in small sub-populations separately. The impact of a single introduction, such as a  
288 rogue deployment or migration, depends on the population size. The smaller the population, the  
289 bigger the impact. This it is a concern when the target population is much larger than the non-target  
290 population, but this is not the case for invasive UK grey squirrels and many other invasive species.

291 The appropriate daisyfield size also depends on the rate of NHEJ ( $P_n$ ) of the gene drive system;  
292 the higher the ( $P_n$ ), the more embryonic lethal offspring will arise and the sooner daisyfield burns  
293 out. To choose a safe number of daisy elements, we also need an estimate of how many animals  
294 a rogue party could obtain, potential breed and add into a non-target population for their own  
295 benefit. Overall, each target population and prospective gene drive strategy needs to be considered  
296 on a case-by-case basis and include an in-depth multidisciplinary risk assessment process.

297 When we consider the spatial aspects of a HD-CivR supplementation programme, the picture  
298 becomes more complex. A key factor is the supplementation location of individuals. Obviously,  
299 supplementing individuals in a location where the population has already been suppressed will be  
300 ineffective. Therefore, different placement strategies can be adopted to keep placing individuals in  
301 a relevant area. A monitoring system where not only the size of the population is known, but also  
302 the location can significantly help HD-CivR continue spreading and suppress a targeted population.

303 In this study, we modelled HD-CivR using five different supplementation placement strategies  
304 in grey squirrel. These were: supplementation at the mean of population location, the mode of  
305 population location, randomly, randomly in 10 groups, and in a moving front (*Figure 6A*). With  
306 supplementation at the mean of the population location, supplementation started in the middle

307 of the population. After a few generations, a gap appears in the middle due to local suppression.  
308 The mean of the populations location still lies in the middle, as can be seen in **Figure 6C** at 20  
309 generations. Therefore, supplementation is not effective until the population is also suppressed in  
310 another location, thereby shifting the mean. Additionally, when there is a single large patch of the  
311 population left and additional smaller clusters, supplementation in the middle of the large patch  
312 allows the smaller clusters to recover, as can be seen in **Figure 6C** after 64 generations.

313 With supplementation at the mode of the population location, we supplement in a location  
314 where there are many individuals. This placement strategy avoids the problem of supplementing  
315 in a location without individuals, either in a doughnut-like spatial population structure or in a  
316 multi-patch population. However, this placement strategy still allows small patches to form and  
317 recover. Supplementation at a random location theoretically means that supplementation happens  
318 uniformly, but in reality, this is not the case. Initially HD-CIvR spreads in multiple locations, but  
319 after the population is suppressed in certain regions, supplementation in those regions becomes  
320 ineffective. Therefore, at a later stage of population suppression this placement scheme becomes  
321 increasingly ineffective.

322 Supplementation at random locations is more effective when they are broken up into multiple  
323 groups (ten in our model). The gene drive spreads in many locations initially like the random single  
324 location placement scheme. After significant suppression of the population some but not all of  
325 the 10 groups supplemented are at ineffective locations. The groups that are placed at relevant  
326 locations are enough to keep the gene drive spreading. In our model supplementation in groups at  
327 random locations gets close to the speed at which a gene drive spreads in a non-spatial model.

328 The moving front placement scheme is very effective initially, as the gene drive spreads uniformly  
329 across the front. In this case, supplementation keeps ahead of where the populations is being  
330 suppressed. This placement strategy allows the population to recover behind the moving front  
331 after effective initial spread and near-complete suppression. To improve efficiency of the moving  
332 front strategy, it may be beneficial to include random supplementation behind the moving front to  
333 prevent animals from re-establishing.

334 Finally, in our spatial model, it was evident that there is more uncertainty in levels of population  
335 suppression than a randomly mating model leads us to believe. As can be seen in **Figure 6B**, the  
336 95% quantiles are broader than the quantiles in **Figure 3**. Therefore, we conclude that to tailor the  
337 amount of supplementation, it is vital to closely monitor a population where a gene drive is used.

### 338 **Assumptions and future work**

339 Our model works under the following six assumptions. First, our model excludes some complexities  
340 of the optimal number of gRNAs for homing. Although our model suggests that multiplexing gRNAs  
341 for both the homing and cleave-and-rescue gene drives is most effective, a recent study using a  
342 more complex model and *in vivo* data shows that the optimal number of gRNAs to use for homing  
343 in *Drosophila melanogaster* is two. They report a decrease in homing efficiency with more than two  
344 gRNAs due to reduced homology and Cas nuclease saturation (**Champer et al., 2020b**). Therefore,  
345 our gene drive with four gRNAs for both homing and cleave-and-rescue will likely be less efficient in  
346 such a complex model. We suggest using two homing gRNAs and four cleave- and-rescue gRNAs  
347 is likely most efficient, while still eliminating all resistance alleles (**Champer et al., 2020b**). It would  
348 be prudent to analyse our gene drive in this complex model as well to get a definitive estimate, as  
349 Cas saturation is thought to have an influence on gene drive efficiency when multiplexing is used  
350 (**Champer et al., 2020b**).

351 Second, we assumed there was no embryonic Cas-gRNA expression. Embryonic Cas-gRNA  
352 expression might be problematic as it leads to resistance allele formation and can interfere with  
353 the cleave-and-rescue mechanism by cleaving alleles from the wildtype parent. As our gene drive  
354 eliminates resistance alleles, embryonic Cas-gRNA expression may not inhibit spread, depending  
355 on the rate. Additionally, if the embryonic Cas-gRNA expression turns out to be more common in  
356 grey squirrel or other species, the cleave-and-rescue part of the gene drive can be harnessed with a

357 double rescue mechanism to overcome this issue, as reported by *Champer et al. (2020a)*.

358 Third, we did not take other types of resistance alleles into account such as mutations rendering  
359 the CRISPR-Cas non-functional. As this is a universal assumption in gene drive research, we will  
360 have to await multigenerational studies to see if this is problematic.

361 Fourth, HD-CivR has not been tested *in vivo*, which is our next step. The recent preprint on a  
362 gene drive very similar to HD-CivR has performed *in vivo* tests in *Drosophila melanogaster* which  
363 showed very efficient conversion rates (*Kandul et al., 2020*). Proof-of-concept testing of HD-CivR  
364 would likely initially occur in *D. melanogaster* and mouse models before progressing to squirrel  
365 studies. Also, recent reports have shown that the VASA promoter for Cas expression in homing  
366 gene drives is not optimal and further investigation to identify a meiosis-specific germline promoter  
367 is needed (*Pfitzner et al., 2020*). Furthermore, non-model species might be difficult to genetically  
368 engineer, although grey squirrel embryology will likely follow the extensive knowledge on rodent  
369 and farmed animal embryology, and similar reagents and equipment could be used. An important  
370 consideration when engineering gene drive is that the modified animals maintain enough wild  
371 vigour to survive and breed in a wild population. Promising technologies for generating gene  
372 drive harbouring mammals with as little intervention as possible include *in vivo* zygotic delivery of  
373 CRISPR reagents by electroporation or viral transduction (*Mehier-Humbert and Guy, 2005; Zhang  
374 and Godbey, 2006*).

375 Fifth, for our spatial modelling, we assumed that an estimation of population size could be made  
376 every year, although there is a significant amount of room for error in this estimate. Additionally,  
377 for some of our placement schemes, we assumed an accurate estimate of population location. As  
378 the random placement in groups scheme turned out most effective, this is not a problem so much  
379 as further potential for improvement. Another direction for future spatial work is the modelling  
380 of real landscapes, which are more complex than what we modelled in this study (*Bradburd and  
381 Ralph, 2019*). In complex landscapes, it might be that gene drive spread is slower or even regionally  
382 confined in some situations. Additionally, there might be spatial dynamics to gene drives in general  
383 such as 'chasing', which is the perpetual escaping and chasing of wildtype and gene drive animals  
384 (*Champer et al., 2019*). Further efforts are necessary to create a more realistic spatial model before  
385 we can consider using a gene drive.

386 A final consideration is that the ecological services the grey squirrel and other invasive species  
387 provide are largely uncharted. Ecologists need to investigate the ecological services that an  
388 invasive species performs and how an abrupt suppression of this invasive population might impact  
389 the ecosystem as a whole. We need to consider other restorative measures such as reintroducing  
390 native species to fragmented habitats, amongst other ecological interventions (*Rode et al., 2019*).  
391 From a regulatory perspective, there is no tested legislative framework for the release of gene drive  
392 organisms; and with regard to our test animal it is currently illegal to breed grey squirrels in the  
393 UK. Developing these legislative frameworks alongside gene drive research is important. More  
394 importantly, the UK needs to continue to broaden public engagement and see whether the public  
395 is receptive to the deployment of gene drive technology in parallel to a financial overview of how  
396 much it would cost to apply gene drives reflecting our predicted need for supplementation.

## 397 **Summary**

398 HD-CivR offers an efficient, self-limiting, and controllable gene drive strategy. We show that in the  
399 spatial model, complete population suppression is achieved approximately five years later than in  
400 the randomly mating population model. We then explored how the placement of supplemented  
401 animals could impact population suppression. Our results show that spatial dynamics of supple-  
402 mentation placement are not prohibitive to the spread of the gene drive, but that in fact, with an  
403 optimised strategy, spread at a rate equal to randomly mating population can be achieved. In our  
404 models, we have shown that grey squirrels have a spatial life history which facilitates the spread of  
405 a gene drive. Therefore, gene drives could be a valuable tool in the conservation toolbox.

## 406 Methods and Materials

407 We describe our methods and materials in two sections. The first section details the randomly  
408 mating population model, and the second the spatial model. For the modelling, we adopted the  
409 work of *Prowse et al. (2017)* and implemented new features. This model is an individual-based,  
410 stochastic, discrete-time model of a randomly mating population. Per individual, the model keeps  
411 track of several characteristics such as age, sex, parents, and the state of genetic loci involved in the  
412 gene drive. For each offspring, we model the homing and subsequent inheritance of the gene drive.  
413 By running this stochastic model several times, we obtain an impression of the possible outcomes.  
414 Several life history parameters of an organism are needed to run this model. The parameters we  
415 used to model a grey squirrel population can be seen in *Table 1*.

### 416 Randomly mating model

417 For the randomly mating model, we added three additional features to the model of *Prowse et al.*  
418 *(2017)*: cleave-and-rescue, daisyfield, and X-shredder. Cleave-and-rescue and daisyfield were not  
419 tested by *Prowse et al. (2017)*, who only compared homing-based gene drives. We also modelled  
420 an X-shredder-cleave-and-rescue gene drive, but the homing-cleave-and-rescue was deemed more  
421 promising because the identification of a highly-specific spermatogenesis promoter remains a  
422 challenge. Also, X-shredder gene drives suffer from the formation of a population equilibrium  
423 instead of complete suppression. In addition to these three new features, we extended the  
424 supplementation functionality, because daisyfield-based population suppression requires flexible  
425 supplementation.

426 1. **Cleave-and-rescue.** In the model, we keep track of each gRNA-targeted site in cleave-and-  
427 rescue target genes and their functionality in each individual. The homing gene drive construct  
428 contains the recoded rescue copy of this target gene. All wildtype organisms start with two  
429 viable target genes, while gene drive organisms start with one viable target gene and one  
430 rescue. In general, after germline Cas-gRNA activity, viable target genes are cleaved and  
431 the rescue gene homes along with the gene drive. However, as with any sites targeted by  
432 a Cas-gRNA, it is possible that resistance alleles form after non-homologous end joining and  
433 on occasion restore functionality of the target gene. Therefore, we implemented cleave-and-  
434 rescue gRNA multiplexing in the model. The probability that cleave-and-rescue target genes

**Table 1.** Key parameters used in the model for the grey squirrel. For the rest of the parameters, see the supplementary code.

| Parameter                                | Value  | Source                                       |
|------------------------------------------|--------|----------------------------------------------|
| <i>Population and reproduction</i>       |        |                                              |
| Population carrying capacity             | 3000   | <i>(Jones et al., 2016)</i>                  |
| Maximum population growth rate*          | 1.16   | <i>(Gurnell, 1996)</i>                       |
| Average litter size                      | 2.87   | <i>(Shorten and Elton, 1951)</i>             |
| Generation time (weeks)                  | 26     | <i>(Barkalow Jr. et al., 1970)</i>           |
| <i>Spatial distribution</i>              |        |                                              |
| Home range radius (m)                    | 80     | <i>(Thompson, 1978a)</i>                     |
| Maximum density (individuals/home range) | 4      | <i>(Thompson, 1978a)</i>                     |
| Maximum mating range radius (m)          | 600    | <i>(Thompson, 1977)</i>                      |
| Mating range observations                | 30     | <i>(Thompson, 1977)</i>                      |
| Maximum dispersal range radius (m)       | 10 000 | <i>(Okubo et al., 1989; Koprowski, 1994)</i> |

\*calculated as the  $\log(\max\{R_0\})$

435 go from  $i$  to  $j$  functional cutting sites ( $P_{ij}$ ) is:

$$P_{ij} = \binom{i}{i-j} (P_c(1-P_f))^{i-j} (1-P_c)^j P_b^{i-j-1}, \quad (1)$$

436 where  $P_c$  is the probability of cutting at a gRNA-targeted site,  $P_f$  is the probability of functional  
437 restoration in case of cutting, and  $P_b$  is the probability that a block of DNA in between two  
438 cutting sites is not removed. This formula consists of four factors: first, we multiply by all  
439 permutations of cutting sites, because their order is irrelevant. Second, we multiply by the  
440 probability that  $i - j$  cutting sites are all cut and repaired functionally. Third, we multiply  
441 by the probability that  $j$  sites remain uncut. Fourth, we multiply by the probability that no  
442 blocks of DNA in between cut sites were removed. We use  $P_c = 0.95$  and  $P_f = 0.667$  following  
443 *Prowse et al. (2017)*. We estimated  $P_b$  from our unpublished data of 18 mouse embryonic  
444 stem cell lines, each cut simultaneously with Cas9 at two sites spaced 36 bp apart. In 3 out  
445 of 18 cases, the block of DNA in between the cut sites was not removed and therefore, we  
446 use a  $P_b$  of 0.2. All left-over probability ( $1 - P_{ij}$ ) is the probability that a target gene is rendered  
447 non-functional. An organism needs to have exactly two copies of the target gene (recoded  
448 rescue or original) to be viable. We assumed that there is no embryonic Cas-gRNA activity.  
449 After random inheritance of parental alleles, we remove non-viable offspring.

- 450 2. **Daisyfield.** We implemented daisyfield by tracking the number of daisyfield elements in the  
451 genome of each individual. Wildtype organisms start without any daisy elements and the  
452 number of daisy elements for gene drive organisms is a parameter in the model. Each daisy  
453 element contains both the homing and the cleave-and-rescue gRNAs and in case of gRNA  
454 multiplexing, it contains one of each different gRNA. Therefore, during germline Cas-gRNA  
455 expression, if no daisy elements are present, both homing and cleave-and-rescue can not  
456 occur. We assumed that daisy elements remain complete through every meiosis, so there is  
457 no crossing over in the middle of them. Also, we assumed that there is no linkage between  
458 daisy elements, that is, they are spaced far apart or located on different chromosomes. During  
459 inheritance, each daisy element from the parents has a 0.5 probability of being inherited to  
460 the offspring.
- 461 3. **X-shredder.** Although the X-shredder is not a part of our final gene drive strategy, we  
462 implemented it in the model. The X-shredder gene drive is modelled on the Y-chromosome  
463 and skews the sex ratio of offspring towards males. The efficiency of this skew is a parameter  
464 in the model and is defined as the probability that offspring of a gene drive animal is male.
- 465 4. **Supplementation.** We made two changes to the supplementation already implemented  
466 by *Prowse et al. (2017)*. Instead of yearly supplementation of the same amount as the initial  
467 gene drive release, we added two parameters to vary supplementation amount and  
468 interval. Supplementation amount can be any percentage of the total population size, and  
469 supplementation interval can be any decimal number of years as long as they coincide with  
470 generations.

## 471 Spatial modelling

472 For the spatial modelling, we added basic spatial functionality on top of the other additions to the  
473 randomly mating model of *Prowse et al. (2017)*. We model a square, two-dimensional space and  
474 assume uniformly distributed resources such as food. The spatial functionality is comprised of  
475 four steps: spatial setup, distance-dependent mate allocation, offspring placement, and movement.  
476 The spatial setup is only done once at the start of the model and initiates everything necessary for  
477 spatial functionality. Mate allocation, offspring placement, and movement occur each generation,  
478 and their purpose is to reflect spatial life histories. Distance-dependent mate allocation ensures  
479 that squirrels who are close together are more likely to mate than squirrels further apart. Offspring  
480 placement demonstrates the location of birth and maternal care of individuals. Movement reflects  
481 the migration of individuals whenever overpopulation occurs in an area. With several parameters

482 shown in **Table 1**, this spatial functionality can be adapted to reflect the spatial life history of many  
483 species. Additionally, we have added spatial placement strategies for supplementation.

484 1. **Spatial setup.** The first step in spatial modelling is to determine the size of the area in which  
485 the simulations take place. As we use a square two-dimensional space, we need to know the  
486 length of the side of this area  $A$ . We calculate  $A$  using the carrying capacity of the population  
487  $K$ , the radius of the home range of the organism  $r$ , and the density at carrying capacity  $D$ :

$$A = \frac{\sqrt{K\pi r^2}}{\sqrt{D}}. \quad (2)$$

488 Essentially, this formula transforms a circular home range radius into an area, multiplies it  
489 by the number of individuals, transforms it into the length of a square area, and makes it  
490 smaller according to the density at carrying capacity. Using this formula, the area is exactly  
491 large enough to hold  $K$  number of individuals at  $D$  density. In this two-dimensional area, we  
492 track the  $x$  and  $y$  coordinates of individuals. Each individual starts at a random location within  
493 the area. Where gene drive individuals are placed depends on the placement strategy.

494 2. **Distance-dependent mate allocation.** During the reproduction step of the model, instead  
495 of random mate allocation, we use distance-dependent mate allocation. We do this in three  
496 steps. First, we calculate the Euclidian distance between all females and males. Second, we  
497 use a Gaussian radial basis function to calculate the probability of a male approaching the  
498 female to mate ( $P_a$ ), depending on the distance  $s$  between them:

$$P_a = e^{-(\epsilon s)^2}, \quad (3)$$

499 where the value  $\epsilon$  determines the shape of the radial basis function and is calculated from  
500 the mating range parameter. In the case of the grey squirrel, the maximum observed mating  
501 range was 600 out of 30 observations (**Thompson, 1977**). Therefore, we assumed that the  
502 probability of a mating range of 600 was 1/30 and from this, we calculate  $\epsilon$ . Third, from the  
503 males that do approach the female, we choose a random one as the father of the offspring.  
504 In the case that no males approach the female, she doesn't reproduce.

505 3. **Offspring placement.** We place offspring at the location of the female at the moment of  
506 reproduction.

507 4. **Movement.** In grey squirrels, migration is the driving force behind a stable population  
508 size (**Thompson, 1978b**). Therefore, we implemented density-dependent migration and not  
509 density-dependent mortality. In the model, we make a distinction between the movement of  
510 migrants and residents. Firstly, we determine which individuals migrate and which remain  
511 as residents. This distinction is density dependent, that is, the density at the location of an  
512 individual determines the probability that they migrate ( $P_m$ ):

$$P_m = \begin{cases} 0 & d \leq D \\ 1 - \frac{D}{d} & d > D \end{cases}, \quad (4)$$

513 where the local density  $d$  and the density at carrying capacity  $D$  are measures of the number  
514 of individuals that are in the home range of an individual. Therefore, when the local density is  
515 below maximum density, individuals will not migrate. When the local density is higher than the  
516 maximum density, the probability of migration is equal to the proportion of individuals that  
517 need to migrate to leave the local density at the maximum density. Next, for both the resident  
518 and the migrant movement, we choose a direction and a distance to determine a new location.  
519 We choose a random direction and a distance from two separate gamma distributions for  
520 residents and emigrants with shape and scale parameters:  $distance \sim \Gamma(k, \theta) \equiv \text{Gamma}(5, r/5)$   
521 for residents and  $distance \sim \Gamma(k, \theta) \equiv \text{Gamma}(5, 3r/5)$  for migrants,  $r$  being the home range. We  
522 use a broader distribution for migrants than for residents as migrants tend to travel greater



523 distances (*Thompson, 1977*). The residents move to a random location in a single step. If  
524 the new location is out of the boundaries of the spatial space, we pick a new direction and  
525 distance. In contrast, migrants move in multiple steps within a certain migrational range to a  
526 place where there is space available, that is, where the local density  $d$  is lower than the density  
527 at carrying capacity  $D$ . The migrant searches for a new location in a lazy manner, which means  
528 that an animal will first try nearby locations, and incrementally migrate further if necessary. In  
529 each step, we pick a random direction and add a new distance from the gamma distribution  
530 to the previous distance. If the maximum migration distance is surpassed, the distance is set  
531 to zero and the process starts again. To ease the computational burden of this algorithm, we  
532 limit the number of steps to 50 and then, we keep the last location regardless of density.

533 5. **Supplementation.** The placement of individuals for supplementation is important. Therefore,  
534 we have implemented five placement strategies that can be used, although further exploration  
535 of this aspect is interesting. The six placement strategies are: middle of the area, mean of  
536 population location, mode of population location, random location at each supplementation,  
537 divided into 10 groups and placed at random locations at each supplementation, and divided  
538 into 10 groups and placed as a moving front in 10 steps.

## 539 Acknowledgments

540 We thank Craig Shuttleworth for all his squirrel-related expertise and advice.

## 541 Funding

542 CBAW acknowledges support from BBSRC ISP through BB/P013732/1 and BB/P013759/1. GG ac-  
543 knowledges support from the BBSRC to The Roslin Institute (BBS/E/D/30002275) and The University  
544 of Edinburgh's Data-Driven Innovation Chancellor's fellowship.

## 545 Data accessibility

546 Code and data are available from the Highlanderlab gitlab: [https://git.ecdf.ed.ac.uk/HighlanderLab\\_](https://git.ecdf.ed.ac.uk/HighlanderLab_public/nfaber_squirrel_gd)  
547 [public/nfaber\\_squirrel\\_gd](https://git.ecdf.ed.ac.uk/HighlanderLab_public/nfaber_squirrel_gd).

## 548 References

- 549 **Barkalow Jr F**, Hamilton R, Soots Jr R. The vital statistics of an unexploited gray squirrel population. *The Journal*  
550 *of Wildlife Management*. 1970; 34(3):489–500. doi: <https://doi.org/10.2307/3798852>.
- 551 **Beaghton A**, Beaghton PJ, Burt A. Vector control with driving Y chromosomes: modelling the evolution of  
552 resistance. *Malaria Journal*. 2017; 16(1):286. doi: <https://doi.org/10.1186/s12936-017-1932-7>.
- 553 **Bradburd GS**, Ralph PL. Spatial Population Genetics: It's About Time. *Annual Review of Ecology, Evolution, and*  
554 *Systematics*. 2019; 50:427–449. doi: <https://doi.org/10.1146/annurev-ecolsys-110316-022659>.
- 555 **Burt A**. Site-specific selfish genes as tools for the control and genetic engineering of natural populations.  
556 *Proceedings of the Royal Society of London Series B: Biological Sciences*. 2003; 270(1518):921–928. doi:  
557 <https://doi.org/10.1098/rspb.2002.2319>.
- 558 **Campbell KJ**, Beek J, Eason CT, Glen AS, Godwin J, Gould F, Holmes ND, Howald GR, Madden FM, Pon-  
559 **der JB**, et al. The next generation of rodent eradications: innovative technologies and tools to improve  
560 species specificity and increase their feasibility on islands. *Biological Conservation*. 2015; 185:47–58. doi:  
561 <https://doi.org/10.1016/j.biocon.2014.10.016>.
- 562 **Champer J**, Buchman A, Akbari OS. Cheating evolution: engineering gene drives to manipulate the fate of wild  
563 populations. *Nature Reviews Genetics*. 2016; 17(3):146. doi: <https://www.doi.org/10.1038/nrg.2015.34>.
- 564 **Champer J**, Kim I, Champer SE, Clark AG, Messer PW. Suppression gene drive in continuous space can  
565 result in unstable persistence of both drive and wild-type alleles. *bioRxiv*. 2019; p. 769810. doi:  
566 <https://doi.org/10.1101/769810>.
- 567 **Champer J**, Kim IK, Champer SE, Clark AG, Messer PW. Performance analysis of novel toxin-antidote CRISPR  
568 gene drive systems. *BMC biology*. 2020; 18(1):1–17. doi: <https://doi.org/10.1101/628362>.

- 569 **Champer J**, Liu J, Oh SY, Reeves R, Luthra A, Oakes N, Clark AG, Messer PW. Reducing resistance allele formation  
570 in CRISPR gene drive. *Proceedings of the National Academy of Sciences*. 2018; 115(21):5522–5527. doi:  
571 <https://doi.org/10.1073/pnas.1720354115>.
- 572 **Champer J**, Reeves R, Oh SY, Liu C, Liu J, Clark AG, Messer PW. Novel CRISPR/Cas9 gene drive constructs reveal  
573 insights into mechanisms of resistance allele formation and drive efficiency in genetically diverse populations.  
574 *PLoS genetics*. 2017; 13(7). doi: <https://doi.org/10.1371/journal.pgen.1006796>.
- 575 **Champer SE**, Oh SY, Liu C, Wen Z, Clark AG, Messer PW, Champer J. Computational and experimental  
576 performance of CRISPR homing gene drive strategies with multiplexed gRNAs. *Science Advances*. 2020;  
577 6(10):eaaz0525. doi: <https://www.doi.org/10.1126/sciadv.aaz0525>.
- 578 **Cong L**, Ran FA, Cox D, Lin S, Barretto R, Habib N, Hsu PD, Wu X, Jiang W, Marraffini LA, et al.  
579 Multiplex genome engineering using CRISPR/Cas systems. *Science*. 2013; 339(6121):819–823. doi:  
580 <https://doi.org/10.1126/science.1231143>.
- 581 **Edgington MP**, Alphey LS. Conditions for success of engineered underdominance gene drive systems. *Journal*  
582 *of theoretical biology*. 2017; 430:128–140. doi: <https://doi.org/10.1016/j.jtbi.2017.07.014>.
- 583 **England N**. Lost life: England's lost and threatened species. Natural England, Peterborough, UK. 2010; .
- 584 **Esvelt KM**, Gemmell NJ. Conservation demands safe gene drive. *PLoS biology*. 2017; 15(11). doi:  
585 <https://doi.org/10.1371/journal.pbio.2003850>.
- 586 **Esvelt KM**, Smidler AL, Catteruccia F, Church GM. Emerging technology: concerning RNA-guided gene drives for  
587 the alteration of wild populations. *Elife*. 2014; 3:e03401. doi: <https://www.doi.org/10.7554/eLife.03401>.
- 588 **Galizi R**, Hammond A, Kyrou K, Taxiarchi C, Bernardini F, O'Loighlin SM, Papanthanos PA, Nolan T, Windbichler  
589 N, Crisanti A. A CRISPR-Cas9 sex-ratio distortion system for genetic control. *Scientific reports*. 2016; 6:31139.  
590 doi: <https://www.doi.org/10.1038/srep31139>.
- 591 **Gantz VM**, Jasinskiene N, Tatarenkova O, Fazekas A, Macias VM, Bier E, James AA. Highly efficient  
592 Cas9-mediated gene drive for population modification of the malaria vector mosquito *Anopheles*  
593 *stephensi*. *Proceedings of the National Academy of Sciences*. 2015; 112(49):E6736–E6743. doi:  
594 <https://doi.org/10.1073/pnas.1521077112>.
- 595 **Grunwald HA**, Gantz VM, Poplawski G, Xu XrS, Bier E, Cooper KL. Super-Mendelian inheritance me-  
596 diated by CRISPR–Cas9 in the female mouse germline. *Nature*. 2019; 566(7742):105–109. doi:  
597 <https://doi.org/10.1038/s41586-019-0875-2>.
- 598 **Gurnell J**, Pepper HW. The control and management of grey squirrel populations in Britain. *European Squirrel*  
599 *Initiative: European Squirrel Initiative*; 2016. p. 407–436.
- 600 **Gurnell J**. The effects of food availability and winter weather on the dynamics of a grey squirrel population in  
601 southern England. *Journal of Applied Ecology*. 1996; 33(2):325–338. doi: <https://doi.org/10.2307/2404754>.
- 602 **Hewson C**, Fuller R. Impacts of Grey Squirrels on Woodland Birds: An Important Predator of Eggs and Young?  
603 *British Trust for Ornithology*. 2003; .
- 604 **Huerta-Cepas J**, Szklarczyk D, Heller D, Hernández-Plaza A, Forslund SK, Cook H, Mende DR, Letunic I, Rattei  
605 T, Jensen LJ, et al. eggNOG 5.0: a hierarchical, functionally and phylogenetically annotated orthology re-  
606 source based on 5090 organisms and 2502 viruses. *Nucleic acids research*. 2019; 47(D1):D309–D314. doi:  
607 <https://doi.org/10.1093/nar/gky1085>.
- 608 **Jones HE**, White A, Lurz PW, Boots M, Shuttleworth CM. Mathematical models of grey squirrel invasion: a case  
609 study on Anglesey. *European Squirrel Initiative: European Squirrel Initiative*; 2016. p. 235–252.
- 610 **Kandul NP**, Liu J, Bennett JB, Marshall JM, Akbari OS. A home and rescue gene drive forces its inheritance stably  
611 persisting in populations. *bioRxiv*. 2020; doi: [10.1101/2020.08.21.261610](https://doi.org/10.1101/2020.08.21.261610).
- 612 **Koprowski JL**. *Sciurus carolinensis*. *Mammalian species*. 1994; (480):1–9. doi: <https://doi.org/10.2307/3504224>.
- 613 **Kyrou K**, Hammond AM, Galizi R, Kranjc N, Burt A, Beaghton AK, Nolan T, Crisanti A. A CRISPR–Cas9 gene  
614 drive targeting doublesex causes complete population suppression in caged *Anopheles gambiae* mosquitoes.  
615 *Nature biotechnology*. 2018; 36(11):1062–1066. doi: <https://doi.org/10.1038/nbt.4245>.

- 616 **Luque GM**, Bellard C, Bertelsmeier C, Bonnaud E, Genovesi P, Simberloff D, Courchamp F. The  
617 100th of the world's worst invasive alien species. *Biological Invasions*. 2014; 16(5):981–985. doi:  
618 <https://doi.org/10.1007/s10530-013-0561-5>.
- 619 **Marshall JM**, Hay BA. Confinement of gene drive systems to local populations: a comparative analysis. *Journal*  
620 *of Theoretical Biology*. 2012; 294:153–171. doi: <https://doi.org/10.1016/j.jtbi.2011.10.032>.
- 621 **McFarlane GR**, Whitelaw CBA, Lillico SG. CRISPR-based gene drives for pest control. *Trends in biotechnology*.  
622 2018; 36(2):130–133. doi: <https://www.doi.org/10.1016/j.tibtech.2017.10.001>.
- 623 **Mehier-Humbert S**, Guy RH. Physical methods for gene transfer: improving the kinetics of gene delivery into  
624 cells. *Advanced drug delivery reviews*. 2005; 57(5):733–753. doi: <https://doi.org/10.1016/j.addr.2004.12.007>.
- 625 **Middleton AD**. 38. The Ecology of the American Grey Squirrel (*Sciurus carolinensis* Gmelin) in the British  
626 Isles. In: *Proceedings of the Zoological Society of London*, vol. 100 Wiley Online Library; 1930. p. 809–843. doi:  
627 <https://doi.org/10.1111/j.1096-3642.1930.tb01000.x>.
- 628 **Min J**, Noble C, Najjar D, Esvelt K. Daisy quorum drives for the genetic restoration of wild populations. *BioRxiv*.  
629 2017; p. 115618. doi: <https://doi.org/10.1101/115618>.
- 630 **Min J**, Noble C, Najjar D, Esvelt KM. Daisyfield gene drive systems harness repeated genomic elements as a  
631 generational clock to limit spread. *BioRxiv*. 2017; p. 104877. doi: <https://doi.org/10.1101/104877>.
- 632 **Mooney HA**. Invasive alien species: the nature of the problem. *Scope-Scientific Committee on Problems of the*  
633 *Environment International Council of Scientific Unions*. 2005; 63:1.
- 634 **Mountford EP**, Peterken GF, Edwards PJ, Manners JG. Long-term change in growth, mortality and regeneration  
635 of trees in Denny Wood, an old-growth wood-pasture in the New Forest (UK). *Perspectives in Plant Ecology,*  
636 *Evolution and Systematics*. 1999; 2(2):223–272. doi: <https://doi.org/10.1098/rspb.2001.1897>.
- 637 **Noble C**, Min J, Olejarz J, Buchthal J, Chavez A, Smidler AL, DeBenedictis EA, Church GM, Nowak MA, Esvelt KM.  
638 Daisy-chain gene drives for the alteration of local populations. *Proceedings of the National Academy of*  
639 *Sciences*. 2019; 116(17):8275–8282. doi: <https://doi.org/10.1073/pnas.1716358116>.
- 640 **Oberhofer G**, Ivy T, Hay BA. Cleave and Rescue, a novel selfish genetic element and general strategy  
641 for gene drive. *Proceedings of the National Academy of Sciences*. 2019; 116(13):6250–6259. doi:  
642 <https://www.doi.org/10.1073/pnas.1816928116>.
- 643 **Okubo A**, Maini PK, Williamson MH, Murray JD. On the spatial spread of the grey squirrel in Britain.  
644 *Proceedings of the Royal Society of London B Biological Sciences*. 1989; 238(1291):113–125. doi:  
645 <https://doi.org/10.1098/rspb.1989.0070>.
- 646 **Pejchar L**, Mooney HA. Invasive species, ecosystem services and human well-being. *Trends in ecology &*  
647 *evolution*. 2009; 24(9):497–504. doi: <https://doi.org/10.1016/j.tree.2009.03.016>.
- 648 **Pfitzner C**, Hughes JN, White MA, Scherer M, Piltz SG, Thomas PQ. Development of zygotic and germline gene  
649 drives in mice. *bioRxiv*. 2020; doi: <https://doi.org/10.1101/2020.06.21.162594>.
- 650 **Prowse TA**, Cassey P, Ross JV, Pfitzner C, Wittmann TA, Thomas P. Dodging silver bullets: good CRISPR gene-drive  
651 design is critical for eradicating exotic vertebrates. *Proceedings of the Royal Society B: Biological Sciences*.  
652 2017; 284(1860):20170799. doi: <https://doi.org/10.1098/rspb.2017.0799>.
- 653 **Rode NO**, Estoup A, Bourguet D, Courtier-Orgogozo V, Débarre F. Population management using gene drive:  
654 molecular design, models of spread dynamics and assessment of ecological risks. *Conservation Genetics*.  
655 2019; p. 1–20. doi: <https://doi.org/10.1007/s10592-019-01165-5>.
- 656 **Sala OE**, Chapin FS, Armesto JJ, Berlow E, Bloomfield J, Dirzo R, Huber-Sanwald E, Huenneke LF, Jackson RB,  
657 Kinzig A, et al. Global biodiversity scenarios for the year 2100. *Science*. 2000; 287(5459):1770–1774. doi:  
658 <https://doi.org/10.1126/science.287.5459.1770>.
- 659 **Shorten M**, Elton C. Some aspects of the biology of the grey squirrel (*Sciurus carolinensis*) in Great Britain.  
660 In: *Proceedings of the Zoological Society of London*, vol. 121 Wiley Online Library; 1951. p. 427–459. doi:  
661 <https://doi.org/10.1111/j.1096-3642.1951.tb00804.x>.
- 662 **Thompson D**. Reproductive behavior of the grey squirrel. *Canadian Journal of Zoology*. 1977; 55(7):1176–1184.  
663 doi: <https://doi.org/10.1139/z77-152>.

- 664 **Thompson D.** The social system of the grey squirrel. *Behaviour*. 1978; 64(3-4):305–328. doi:  
665 <https://doi.org/10.1163/156853978X00080>.
- 666 **Thompson DC.** Regulation of a northern grey squirrel (*Sciurus carolinensis*) population. *Ecology*. 1978; 59(4):708–  
667 715. doi: <https://doi.org/10.2307/1938774>.
- 668 **Tompkins DM, Sainsbury AW, Nettleton P, Buxton D, Gurnell J.** Parapoxvirus causes a deleterious disease in  
669 red squirrels associated with UK population declines. *Proceedings of the Royal Society of London Series B:*  
670 *Biological Sciences*. 2002; 269(1490):529–533.
- 671 **Unckless RL, Clark AG, Messer PW.** Evolution of resistance against CRISPR/Cas9 gene drive. *Genetics*. 2017;  
672 205(2):827–841. doi: <https://doi.org/10.1534/genetics.116.197285>.
- 673 **Williams F, Eschen R, Harris A, Djeddour D, Pratt C, Shaw R, Varia S, Lamontagne-Godwin J, Thomas S, Murphy**  
674 **S, et al.** The economic cost of invasive non-native species on Great Britain. *CABI Proj No VM10066*. 2010; p.  
675 1–99.
- 676 **Zhang X, Godbey W.** Viral vectors for gene delivery in tissue engineering. *Advanced drug delivery reviews*. 2006;  
677 58(4):515–534. doi: <https://doi.org/10.1016/j.addr.2006.03.006>.

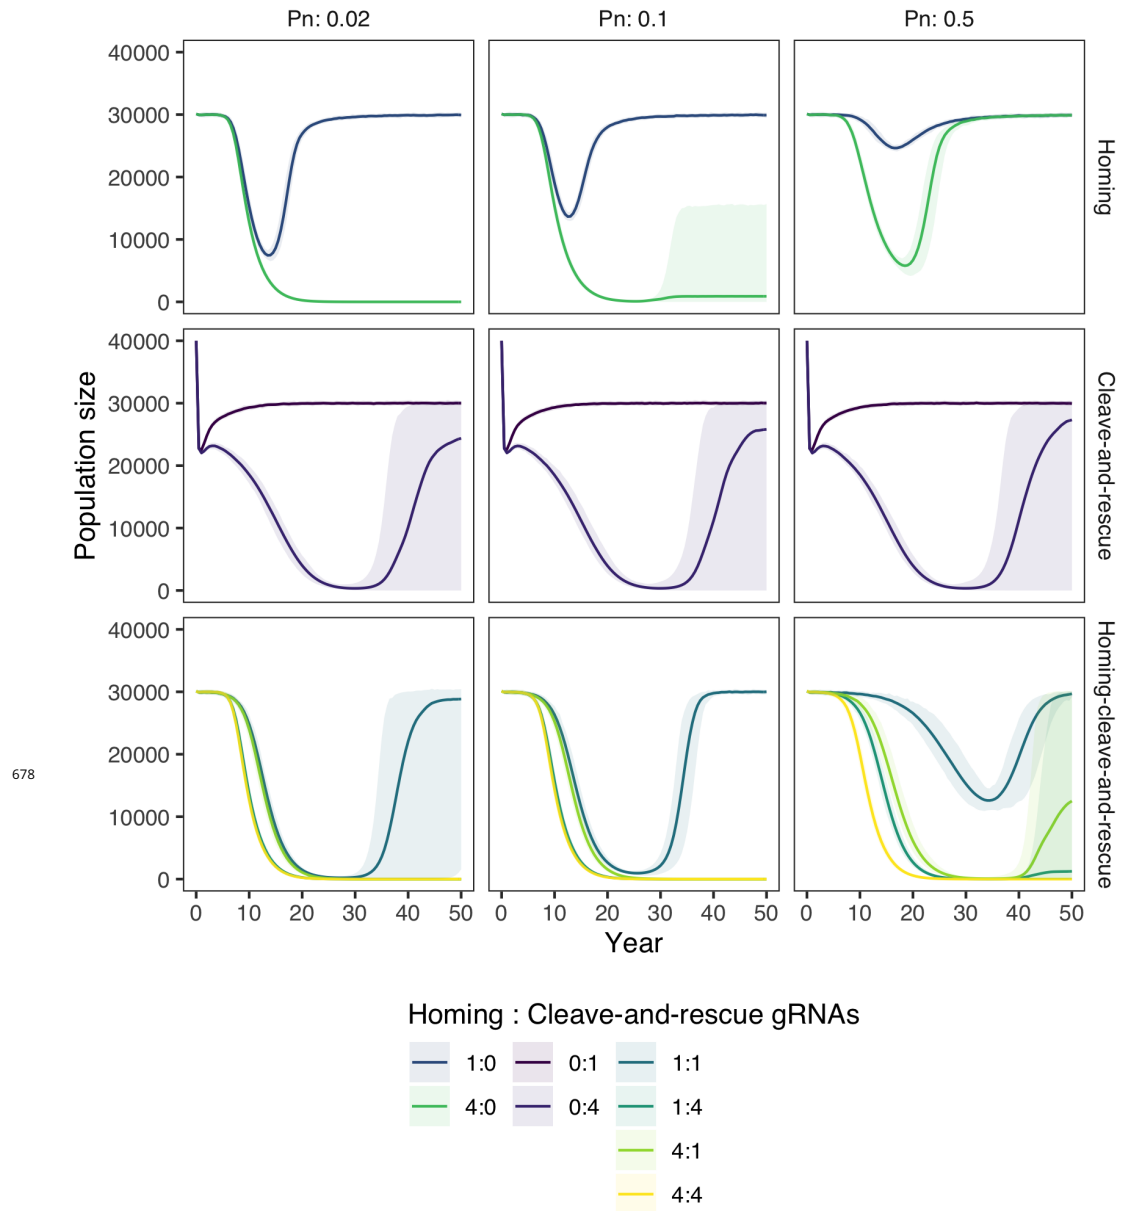

**Figure 3-Figure supplement 1.** The same as **Figure 3**, but run in a big population with a carrying capacity of 30,000 instead of 3,000. Population size over time after the introduction of gene drive squirrels with either a standard homing, a standard cleave-and-rescue, or a homing-cleave-and-rescue gene drive to a population with carrying capacity 30,000. All simulations are based on a single release of 100 squirrels is done, other than the standard cleave-and-rescue gene drive, which requires a release of 10,000 squirrels. Lines represent the average population size over 100 model replications, while opaque ribbons represent the 95% quantiles. The model was run with 3 different rates of NHEJ repair during homing ( $P_n$ ) and with different numbers of gRNAs for the homing and the cleave-and-rescue components of the gene drive.

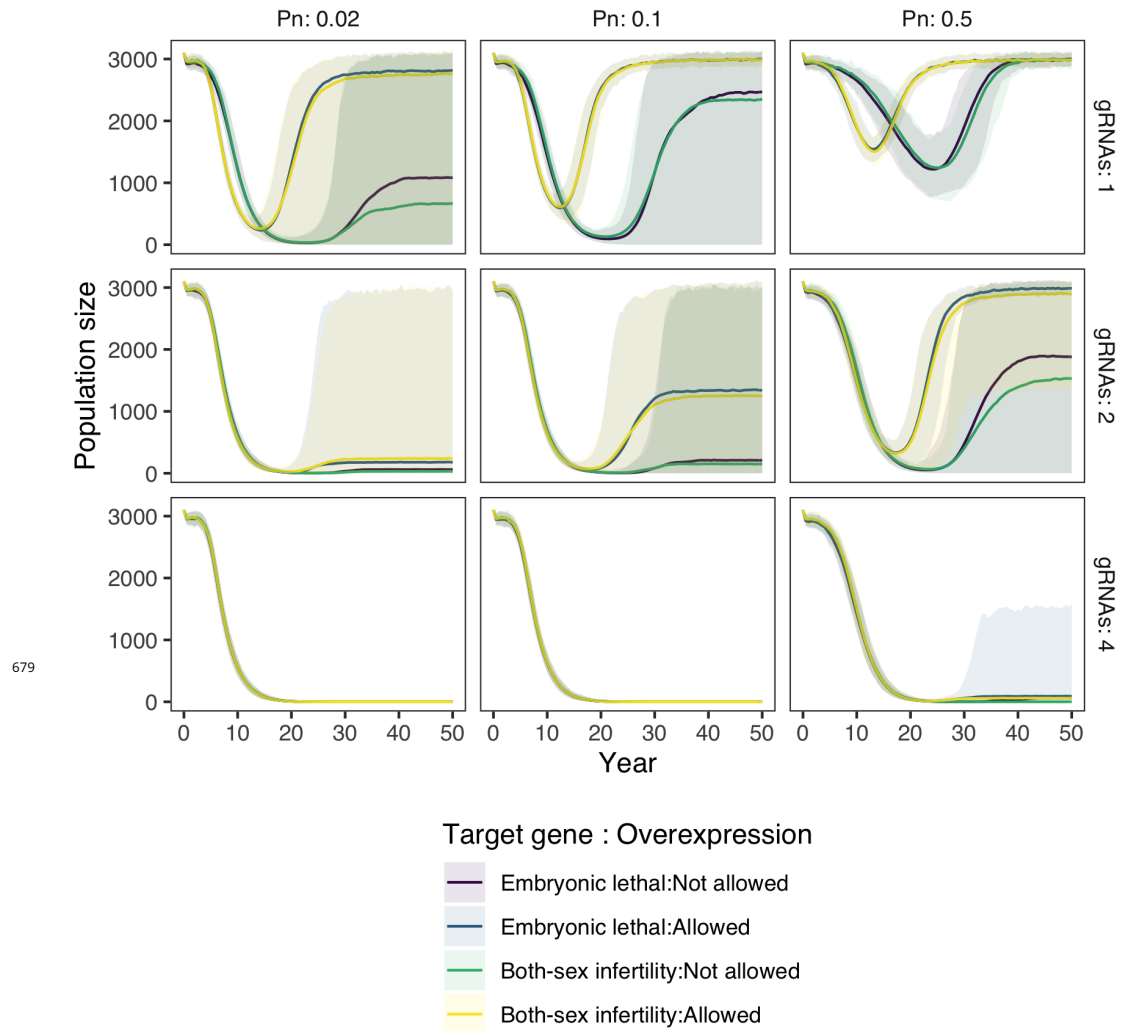

**Figure 3-Figure supplement 2.** An exploration of which type of gene is best targeted by the cleave-and-rescue part of the gene drive: both-sex infertility or developmental non-viability, and overexpression biologically tolerable or not. Parameters are kept the same as in **Figure 3**, except that we used 1 gRNA for the homing part of the gene drive, and either 1, 2 or 4 gRNAs for the cleave-and-rescue part. Population size over time after the introduction of 100 gene drive squirrels with a homing-cleave-and-rescue gene drive to a population with carrying capacity 3,000. Lines represent the average population size over 100 model replications, while opaque ribbons represent the 95% quantiles. The model was run with 3 different rates of NHEJ repair during homing ( $P_n$ ).

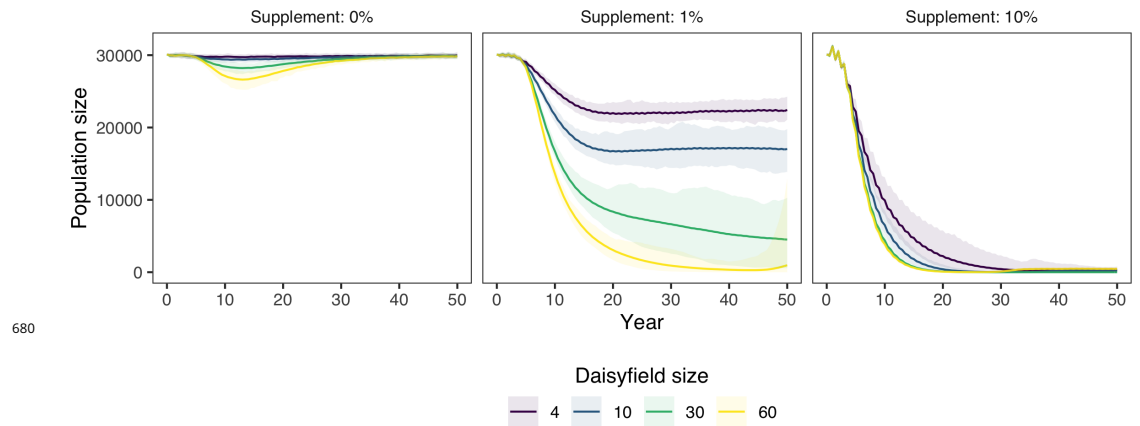

680

**Figure 4-Figure supplement 1.** The same as **Figure 4**, but run in a big population with a carrying capacity of 30,000. Population size over time after the introduction of 100 squirrels with a HD-CIvR gene drive. The model was run with an NHEJ rate ( $P_n$ ) of 0.02, 1 homing gRNA, and 4 cleave-and-rescue gRNAs. Gene drive squirrel supplementation was done yearly, the amount being a percentage (0, 1, or 10%) of the total population size at that moment. Lines represent the average population size over 100 model replications, while opaque ribbons represent the 95% quantiles.

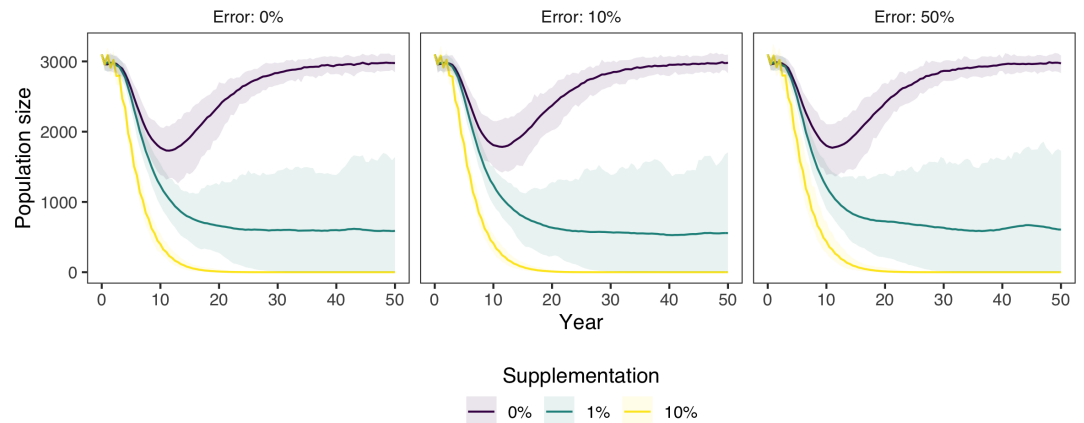

681

**Figure 4-Figure supplement 2.** The same as **Figure 4**, but instead of an accurate estimate of the population size for supplementation, a certain level of error is introduced. The error is defined on a yearly basis as a normal distribution with the true population size as mean and a certain percentage of the true population size as standard deviation. Population size over time after the introduction of 100 squirrels with a HD-CIvR gene drive to a population of carrying capacity 3,000. The model was run with an NHEJ rate ( $P_n$ ) of 0.02, 1 homing gRNA, and 4 cleave-and-rescue gRNAs. Gene drive squirrel supplementation was done yearly, the amount being a percentage (0, 1, or 10%) of the total population size at that moment, plus the abovementioned error. Lines represent the average population size over 100 model replications, while opaque ribbons represent the 95% quantiles.

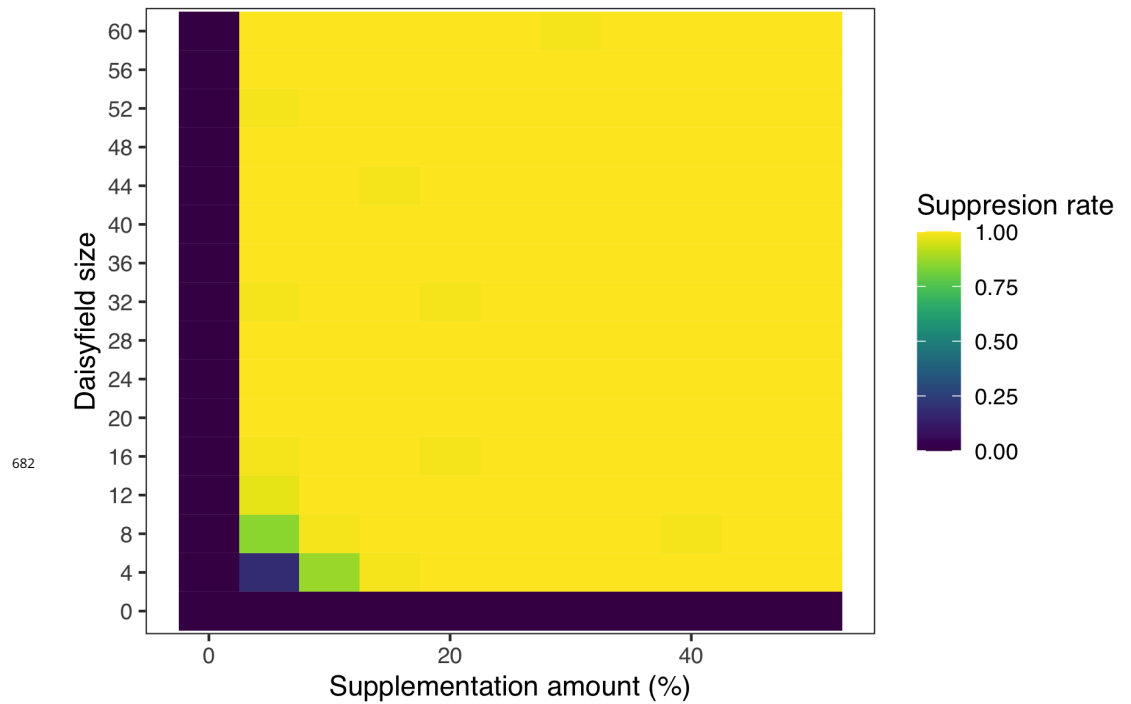



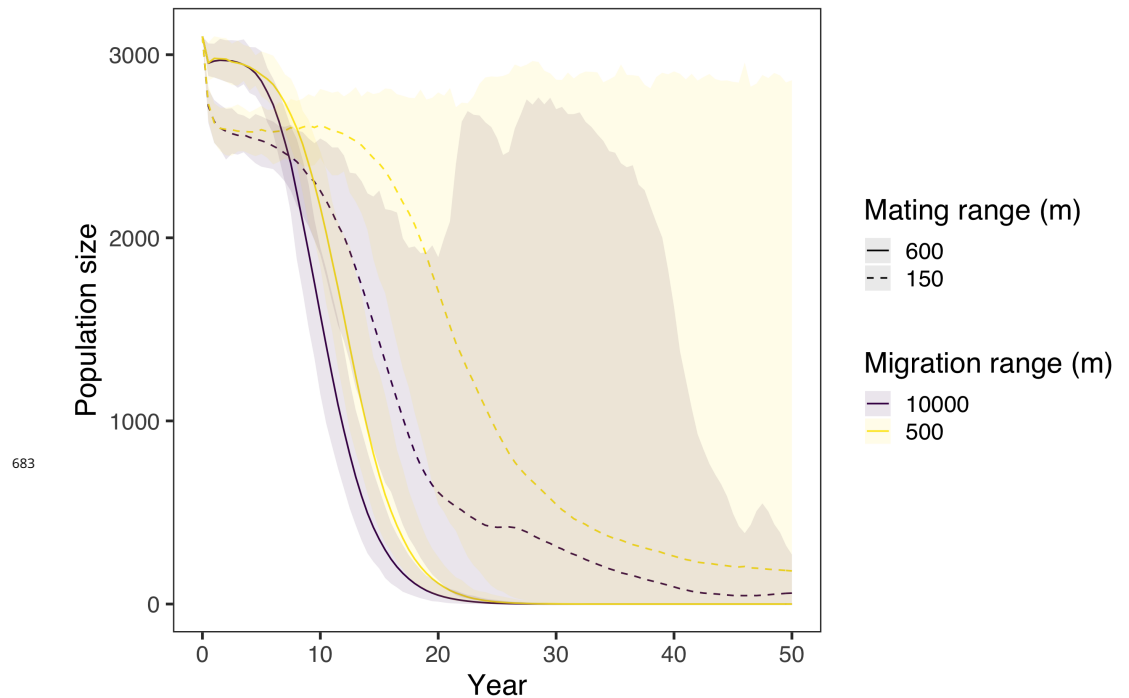

**Figure 5—Figure supplement 1.** A sensitivity analysis of two crucial parameters in our spatial model (Figure 5): mating range and migration range. We model population size over time after the introduction of 100 squirrels with a homing-cleave-and-rescue gene drive with 1 homing gRNA and 4 cleave-and-rescue gRNAs. An NHEJ rate ( $P_n$ ) of 0.02 was used. In the spatial model, gene drive squirrels were placed in the middle of the area. Lines represent the average population size over 100 model replications, while opaque ribbons represent the 95% quantiles.
